# Supplementary material for: Keeping it complicated: Mitochondrial genome plasticity across diplonemids
Source: PubMed Central journal article supplement (PMC5658414; doi:10.1038/s41598-017-14286-z), 2017-10-26
Supplement: 41598_2017_14286_MOESM1_ESM.pdf [file 41598_2017_14286_MOESM1_ESM.pdf]

## SUPPLEMENTARY MATERIAL

### Keeping it complicated: Mitochondrial genome plasticity across diplomonids

Matus Valach <sup>1,†</sup>, Sandrine Moreira <sup>1,10,†</sup>, Steve Hoffmann <sup>2</sup>, Peter F. Stadler <sup>3,4,5,6,7,8,9</sup>, Gertraud Burger <sup>1</sup>

<sup>1</sup> Department of biochemistry and Robert-Cedergren Centre for Bioinformatics and Genomics, Université de Montréal, 2900 Edouard-Montpetit, Montreal H3T 1J4, QC, Canada

<sup>2</sup> Leipzig University, LIFE - Leipzig Research Center for Civilization Diseases, Haertelstrasse 16-18, Leipzig, D-04107, Germany

<sup>3</sup> Bioinformatics Group, Department Computer Science, and Interdisciplinary Center for Bioinformatics, University Leipzig, Härtelstrasse 16-18, D-04107 Leipzig, Germany

<sup>4</sup> German Centre for Integrative Biodiversity Research (iDiv) Halle-Jena-Leipzig, Competence Center for Scalable Data Services and Solutions, and Leipzig Research Center for Civilization Diseases, University Leipzig, D-04107 Leipzig, Germany

<sup>5</sup> Max Planck Institute for Mathematics in the Sciences, Inselstrasse 22, D-04103 Leipzig, Germany

<sup>6</sup> Fraunhofer Institute for Cell Therapy and Immunology, Perlickstrasse 1, D-04103 Leipzig, Germany

<sup>7</sup> Department of Theoretical Chemistry of the University of Vienna, Währingerstrasse 17, A-1090 Vienna, Austria

<sup>8</sup> Center for RNA in Technology and Health, University of Copenhagen, Grønnegårdsvej 3, 1870 Frederiksberg C, Denmark

<sup>9</sup> Santa Fe Institute, 1399 Hyde Park Road, Santa Fe, NM 87501, USA

<sup>10</sup> Present address: Department of Biochemistry and Molecular Biophysics, Columbia University, Hammer Health Science Center, 701 W 168th St, New York, NY 10031, USA

† These authors contributed equally to this work.

\* Correspondence and requests for materials should be addressed to G.B. (email: [gertraud.burger@umontreal.ca](mailto:gertraud.burger@umontreal.ca)) or M.V. (email: [matus.a.valach@gmail.com](mailto:matus.a.valach@gmail.com)).

**Supplementary Table S1.** Catalog of all detected modules in the four diplomonads.

| Gene        | Module | Module ID <sup>a</sup> | 5' end <sup>b</sup> | 3' end <sup>b</sup> | Gene module size <sup>c</sup> [bp] | Transcript module size <sup>d</sup> [bp] |
|-------------|--------|------------------------|---------------------|---------------------|------------------------------------|------------------------------------------|
| <i>atp6</i> | m1     | <i>Da_atp6-m1</i>      | curated             | curated             | 162                                | 162                                      |
|             |        | <i>Dp_atp6-m1</i>      | curated             | unambiguous         | 168                                | 168                                      |
|             |        | <i>Ds_atp6-m1</i>      | curated_homology    | curated             | 165                                | 165                                      |
|             |        | <i>Re_atp6-m1</i>      | curated_homology    | curated             | 156                                | 156                                      |
|             | m2     | <i>Da_atp6-m2</i>      | curated             | unambiguous         | 269                                | 269                                      |
|             |        | <i>Dp_atp6-m2</i>      | unambiguous         | curated             | 269                                | 269                                      |
|             |        | <i>Ds_atp6-m2</i>      | curated             | unambiguous         | 269                                | 269                                      |
|             |        | <i>Re_atp6-m2</i>      | curated             | curated             | 269                                | 269                                      |
|             | m3     | <i>Da_atp6-m3</i>      | unambiguous         | ambiguous_U_-2      | 143                                | 143                                      |
|             |        | <i>Dp_atp6-m3</i>      | curated             | ambiguous_U_-1      | 140                                | 140                                      |
|             |        | <i>Ds_atp6-m3</i>      | unambiguous         | ambiguous_U_-1      | 140                                | 143                                      |
|             |        | <i>Re_atp6-m3</i>      | curated             | curated_homology    | 142                                | 142                                      |
| <i>cob</i>  | m1     | <i>Da_cob-m1</i>       | curated             | curated             | 198                                | 198                                      |
|             |        | <i>Dp_cob-m1</i>       | curated             | unambiguous         | 198                                | 198                                      |
|             |        | <i>Ds_cob-m1</i>       | curated_homology    | curated             | 198                                | 198                                      |
|             |        | <i>Re_cob-m1</i>       | curated_homology    | unambiguous         | 198                                | 198                                      |
|             | m2     | <i>Da_cob-m2</i>       | curated             | curated             | 154                                | 154                                      |
|             |        | <i>Dp_cob-m2</i>       | unambiguous         | curated             | 154                                | 154                                      |
|             |        | <i>Ds_cob-m2</i>       | curated             | curated             | 154                                | 154                                      |
|             |        | <i>Re_cob-m2</i>       | curated             | unambiguous         | 154                                | 154                                      |
|             | m3     | <i>Da_cob-m3</i>       | curated             | curated             | 138                                | 138                                      |
|             |        | <i>Dp_cob-m3</i>       | curated             | unambiguous         | 138                                | 138                                      |
|             |        | <i>Ds_cob-m3</i>       | curated             | curated             | 138                                | 138                                      |
|             |        | <i>Re_cob-m3</i>       | curated             | curated             | 138                                | 138                                      |
|             | m4     | <i>Da_cob-m4</i>       | curated             | curated             | 198                                | 198                                      |
|             |        | <i>Dp_cob-m4</i>       | unambiguous         | unambiguous         | 198                                | 198                                      |
|             |        | <i>Ds_cob-m4</i>       | curated             | curated             | 198                                | 198                                      |
|             |        | <i>Re_cob-m4</i>       | curated             | unambiguous         | 198                                | 198                                      |
|             | m5     | <i>Da_cob-m5</i>       | curated             | unambiguous         | 279                                | 279                                      |
|             |        | <i>Dp_cob-m5</i>       | unambiguous         | unambiguous         | 279                                | 279                                      |
|             |        | <i>Ds_cob-m5</i>       | curated             | curated             | 279                                | 279                                      |
|             |        | <i>Re_cob-m5</i>       | curated             | unambiguous         | 279                                | 279                                      |
|             | m6     | <i>Da_cob-m6</i>       | unambiguous         | unambiguous         | 123                                | 126                                      |
|             |        | <i>Dp_cob-m6</i>       | unambiguous         | ambiguous_U_-1      | 123                                | 126                                      |
|             |        | <i>Ds_cob-m6</i>       | curated             | ambiguous_U_-1      | 126                                | 126                                      |
|             |        | <i>Re_cob-m6</i>       | unambiguous         | unambiguous         | 122                                | 126                                      |
| <i>cox1</i> | m1     | <i>Da_cox1-m1</i>      | curated             | unambiguous         | 192                                | 192                                      |
|             |        | <i>Dp_cox1-m1</i>      | curated             | curated             | 195                                | 195                                      |
|             |        | <i>Ds_cox1-m1</i>      | curated_homology    | curated             | 189                                | 189                                      |
|             |        | <i>Re_cox1-m1</i>      | curated_homology    | curated             | 189                                | 189                                      |
|             | m2     | <i>Da_cox1-m2</i>      | curated             | curated             | 124                                | 124                                      |
|             |        | <i>Dp_cox1-m2</i>      | curated             | curated             | 124                                | 124                                      |
|             |        | <i>Ds_cox1-m2</i>      | curated             | unambiguous         | 124                                | 124                                      |
|             |        | <i>Re_cox1-m2</i>      | curated             | curated             | 124                                | 124                                      |
|             | m3     | <i>Da_cox1-m3</i>      | curated             | curated             | 263                                | 263                                      |
|             |        | <i>Dp_cox1-m3</i>      | curated             | unambiguous         | 263                                | 263                                      |
|             |        | <i>Ds_cox1-m3</i>      | curated             | unambiguous         | 263                                | 263                                      |
|             |        | <i>Re_cox1-m3</i>      | curated             | curated             | 263                                | 263                                      |
|             | m4     | <i>Da_cox1-m4</i>      | curated             | unambiguous         | 220                                | 226                                      |
|             |        | <i>Dp_cox1-m4</i>      | unambiguous         | unambiguous         | 220                                | 226                                      |
|             |        | <i>Ds_cox1-m4</i>      | unambiguous         | unambiguous         | 220                                | 226                                      |
|             |        | <i>Re_cox1-m4</i>      | curated             | unambiguous         | 220                                | 226                                      |
|             | m5     | <i>Da_cox1-m5</i>      | unambiguous         | curated             | 179                                | 179                                      |
|             |        | <i>Dp_cox1-m5</i>      | unambiguous         | curated             | 179                                | 179                                      |

| Gene | Module | Module ID <sup>a</sup> | 5' end <sup>b</sup> | 3' end <sup>b</sup> | Gene module size <sup>c</sup> [bp] | Transcript module size <sup>d</sup> [bp] |
|------|--------|------------------------|---------------------|---------------------|------------------------------------|------------------------------------------|
| cox1 | m6     | <i>Ds_cox1-m5</i>      | curated             | unambiguous         | 179                                | 179                                      |
|      |        | <i>Re_cox1-m5</i>      | unambiguous         | curated             | 179                                | 179                                      |
|      |        | <i>Da_cox1-m6</i>      | curated             | unambiguous         | 169                                | 169                                      |
|      |        | <i>Dp_cox1-m6</i>      | curated             | unambiguous         | 169                                | 169                                      |
|      | m7     | <i>Ds_cox1-m6</i>      | curated             | unambiguous         | 169                                | 169                                      |
|      |        | <i>Re_cox1-m6</i>      | curated             | curated             | 169                                | 169                                      |
|      |        | <i>Da_cox1-m7</i>      | unambiguous         | unambiguous         | 90                                 | 90                                       |
|      |        | <i>Dp_cox1-m7</i>      | unambiguous         | curated             | 90                                 | 90                                       |
|      | m8     | <i>Ds_cox1-m7</i>      | curated             | curated             | 90                                 | 90                                       |
|      |        | <i>Re_cox1-m7</i>      | curated             | unambiguous         | 90                                 | 90                                       |
|      |        | <i>Da_cox1-m8</i>      | unambiguous         | curated             | 110                                | 110                                      |
|      |        | <i>Dp_cox1-m8</i>      | curated             | curated             | 110                                | 110                                      |
|      | m9     | <i>Ds_cox1-m8</i>      | curated             | unambiguous         | 110                                | 110                                      |
|      |        | <i>Re_cox1-m8</i>      | unambiguous         | curated             | 110                                | 110                                      |
|      |        | <i>Da_cox1-m9</i>      | curated             | unambiguous         | 246                                | 246                                      |
|      |        | <i>Dp_cox1-m9</i>      | curated             | unambiguous         | 249                                | 250                                      |
| cox2 | m1     | <i>Ds_cox1-m9</i>      | unambiguous         | ambiguous_UA_-4     | 237                                | 237                                      |
|      |        | <i>Re_cox1-m9</i>      | curated             | curated             | 246                                | 251                                      |
| cox2 | m1     | <i>Da_cox2-m1</i>      | curated             | unambiguous         | 236                                | 236                                      |
|      |        | <i>Dp_cox2-m1</i>      | curated             | curated             | 236                                | 236                                      |
|      |        | <i>Ds_cox2-m1</i>      | curated_homology    | unambiguous         | 236                                | 236                                      |
|      |        | <i>Re_cox2-m1</i>      | curated_homology    | unambiguous         | 236                                | 236                                      |
|      | m2     | <i>Da_cox2-m2</i>      | unambiguous         | curated             | 158                                | 158                                      |
|      |        | <i>Dp_cox2-m2</i>      | curated             | curated             | 158                                | 158                                      |
|      |        | <i>Ds_cox2-m2</i>      | curated             | unambiguous         | 158                                | 158                                      |
|      |        | <i>Re_cox2-m2</i>      | curated             | unambiguous         | 158                                | 158                                      |
|      | m3     | <i>Da_cox2-m3</i>      | curated             | unambiguous         | 76                                 | 76                                       |
|      |        | <i>Dp_cox2-m3</i>      | curated             | unambiguous         | 76                                 | 76                                       |
|      |        | <i>Ds_cox2-m3</i>      | unambiguous         | curated             | 76                                 | 76                                       |
|      |        | <i>Re_cox2-m3</i>      | unambiguous         | curated             | 76                                 | 76                                       |
|      | m4     | <i>Da_cox2-m4</i>      | unambiguous         | ambiguous_U_-2      | 126                                | 128                                      |
|      |        | <i>Dp_cox2-m4</i>      | unambiguous         | unambiguous         | 125                                | 128                                      |
|      |        | <i>Ds_cox2-m4</i>      | curated             | unambiguous         | 125                                | 128                                      |
|      |        | <i>Re_cox2-m4</i>      | curated             | unambiguous         | 125                                | 128                                      |
| cox3 | m1     | <i>Da_cox3-m1</i>      | curated             | curated             | 338                                | 338                                      |
|      |        | <i>Dp_cox3-m1</i>      | curated             | unambiguous         | 344                                | 344                                      |
|      |        | <i>Ds_cox3-m1</i>      | curated_homology    | unambiguous         | 335                                | 335                                      |
|      |        | <i>Re_cox3-m1</i>      | curated_homology    | curated             | 335                                | 335                                      |
|      | m2     | <i>Da_cox3-m2</i>      | curated             | unambiguous         | 266                                | 266                                      |
|      |        | <i>Dp_cox3-m2</i>      | unambiguous         | curated             | 266                                | 266                                      |
|      |        | <i>Ds_cox3-m2</i>      | unambiguous         | unambiguous         | 266                                | 266                                      |
|      |        | <i>Re_cox3-m2</i>      | curated             | curated             | 266                                | 266                                      |
|      | m3     | <i>Da_cox3-m3</i>      | unambiguous         | ambiguous_U_-1      | 231                                | 231                                      |
|      |        | <i>Dp_cox3-m3</i>      | curated             | unambiguous         | 230                                | 231                                      |
|      |        | <i>Ds_cox3-m3</i>      | unambiguous         | ambiguous_U_-1      | 231                                | 231                                      |
|      |        | <i>Re_cox3-m3</i>      | curated             | ambiguous_U_-1      | 223                                | 225                                      |
| nad1 | m1     | <i>Da_nad1-m1</i>      | curated             | unambiguous         | 189                                | 189                                      |
|      |        | <i>Dp_nad1-m1</i>      | curated             | curated             | 189                                | 189                                      |
|      |        | <i>Ds_nad1-m1</i>      | curated_homology    | curated             | 189                                | 189                                      |
|      |        | <i>Re_nad1-m1</i>      | curated_homology    | curated             | 189                                | 189                                      |
|      | m2     | <i>Da_nad1-m2</i>      | unambiguous         | curated             | 114                                | 114                                      |
|      |        | <i>Dp_nad1-m2</i>      | curated             | unambiguous         | 114                                | 114                                      |
|      |        | <i>Ds_nad1-m2</i>      | curated             | unambiguous         | 114                                | 114                                      |
|      |        | <i>Re_nad1-m2</i>      | curated             | unambiguous         | 114                                | 114                                      |

| Gene        | Module            | Module ID <sup>a</sup> | 5' end <sup>b</sup> | 3' end <sup>b</sup> | Gene module size <sup>c</sup> [bp] | Transcript module size <sup>d</sup> [bp] |
|-------------|-------------------|------------------------|---------------------|---------------------|------------------------------------|------------------------------------------|
|             | m3                | <i>Da_nad1-m3</i>      | curated             | curated             | 166                                | 166                                      |
|             |                   | <i>Dp_nad1-m3</i>      | unambiguous         | curated             | 166                                | 166                                      |
|             |                   | <i>Ds_nad1-m3</i>      | unambiguous         | unambiguous         | 166                                | 166                                      |
|             |                   | <i>Re_nad1-m3</i>      | unambiguous         | curated             | 166                                | 166                                      |
|             | m4                | <i>Da_nad1-m4</i>      | curated             | unambiguous         | 233                                | 233                                      |
|             |                   | <i>Dp_nad1-m4</i>      | curated             | curated             | 233                                | 233                                      |
|             |                   | <i>Ds_nad1-m4</i>      | curated             | unambiguous         | 233                                | 233                                      |
|             |                   | <i>Re_nad1-m4</i>      | curated             | unambiguous         | 233                                | 233                                      |
|             | m5                | <i>Da_nad1-m5</i>      | unambiguous         | unambiguous         | 205                                | 220                                      |
|             |                   | <i>Dp_nad1-m5</i>      | curated             | unambiguous         | 204                                | 220                                      |
|             |                   | <i>Ds_nad1-m5</i>      | unambiguous         | unambiguous         | 200                                | 217                                      |
|             |                   | <i>Re_nad1-m5</i>      | curated             | ambiguous_U_-2      | 200                                | 220                                      |
| <i>nad4</i> | m1                | <i>Da_nad4-m1</i>      | curated_homology    | unambiguous         | 247                                | 247                                      |
|             |                   | <i>Dp_nad4-m1</i>      | curated             | curated             | 247                                | 247                                      |
|             |                   | <i>Ds_nad4-m1</i>      | curated_homology    | unambiguous         | 247                                | 247                                      |
|             |                   | <i>Re_nad4-m1</i>      | curated_homology    | curated             | 247                                | 247                                      |
|             | m2                | <i>Da_nad4-m2</i>      | unambiguous         | curated             | 225                                | 225                                      |
|             |                   | <i>Dp_nad4-m2</i>      | curated             | curated             | 225                                | 225                                      |
|             |                   | <i>Ds_nad4-m2</i>      | unambiguous         | unambiguous         | 225                                | 225                                      |
|             |                   | <i>Re_nad4-m2</i>      | curated             | unambiguous         | 225                                | 225                                      |
|             | m3                | <i>Da_nad4-m3</i>      | curated             | curated             | 171                                | 171                                      |
|             |                   | <i>Dp_nad4-m3</i>      | curated             | unambiguous         | 168                                | 168                                      |
|             |                   | <i>Ds_nad4-m3</i>      | unambiguous         | unambiguous         | 168                                | 168                                      |
|             |                   | <i>Re_nad4-m3</i>      | curated             | unambiguous         | 168                                | 168                                      |
|             | m4                | <i>Da_nad4-m4</i>      | curated             | unambiguous         | 134                                | 136                                      |
|             |                   | <i>Dp_nad4-m4</i>      | unambiguous         | unambiguous         | 134                                | 136                                      |
|             |                   | <i>Ds_nad4-m4</i>      | curated             | curated             | 131                                | 133                                      |
|             |                   | <i>Re_nad4-m4</i>      | unambiguous         | curated             | 134                                | 136                                      |
|             | m5                | <i>Da_nad4-m5</i>      | unambiguous         | unambiguous         | 74                                 | 74                                       |
|             |                   | <i>Dp_nad4-m5</i>      | unambiguous         | unambiguous         | 74                                 | 74                                       |
|             |                   | <i>Ds_nad4-m5</i>      | unambiguous         | unambiguous         | 74                                 | 74                                       |
|             |                   | <i>Re_nad4-m5</i>      | curated             | curated             | 74                                 | 74                                       |
|             | m6                | <i>Da_nad4-m6</i>      | unambiguous         | unambiguous         | 165                                | 165                                      |
|             |                   | <i>Dp_nad4-m6</i>      | unambiguous         | unambiguous         | 165                                | 165                                      |
|             |                   | <i>Ds_nad4-m6</i>      | curated             | unambiguous         | 165                                | 165                                      |
|             |                   | <i>Re_nad4-m6</i>      | curated             | unambiguous         | 165                                | 165                                      |
| m7          | <i>Da_nad4-m7</i> | unambiguous            | curated             | 120                 | 120                                |                                          |
|             | <i>Dp_nad4-m7</i> | unambiguous            | unambiguous         | 120                 | 120                                |                                          |
|             | <i>Ds_nad4-m7</i> | unambiguous            | curated             | 120                 | 120                                |                                          |
|             | <i>Re_nad4-m7</i> | unambiguous            | unambiguous         | 120                 | 120                                |                                          |
| m8          | <i>Da_nad4-m8</i> | curated                | curated             | 164                 | 171                                |                                          |
|             | <i>Dp_nad4-m8</i> | unambiguous            | unambiguous         | 170                 | 172                                |                                          |
|             | <i>Ds_nad4-m8</i> | curated                | ambiguous_U_-1      | 174                 | 174                                |                                          |
|             | <i>Re_nad4-m8</i> | curated                | curated             | 143                 | 149                                |                                          |
| <i>nad5</i> | m1                | <i>Da_nad5-m1</i>      | curated_homology    | unambiguous         | 288                                | 288                                      |
|             |                   | <i>Dp_nad5-m1</i>      | curated             | curated             | 291                                | 291                                      |
|             |                   | <i>Ds_nad5-m1</i>      | curated_homology    | curated             | 294                                | 294                                      |
|             |                   | <i>Re_nad5-m1</i>      | curated_homology    | curated             | 288                                | 288                                      |
|             | m2                | <i>Da_nad5-m2</i>      | unambiguous         | curated             | 218                                | 218                                      |
|             |                   | <i>Dp_nad5-m2</i>      | curated             | unambiguous         | 218                                | 218                                      |
|             |                   | <i>Ds_nad5-m2</i>      | curated             | curated             | 218                                | 218                                      |
|             |                   | <i>Re_nad5-m2</i>      | curated             | unambiguous         | 218                                | 218                                      |
|             | m3                | <i>Da_nad5-m3</i>      | curated             | unambiguous         | 57                                 | 57                                       |
|             |                   | <i>Dp_nad5-m3</i>      | unambiguous         | unambiguous         | 60                                 | 60                                       |

| Gene        | Module | Module ID <sup>a</sup> | 5' end <sup>b</sup> | 3' end <sup>b</sup> | Gene module size <sup>c</sup> [bp] | Transcript module size <sup>d</sup> [bp] |
|-------------|--------|------------------------|---------------------|---------------------|------------------------------------|------------------------------------------|
|             |        | <i>Ds_nad5-m3</i>      | curated             | curated             | 66                                 | 66                                       |
|             |        | <i>Re_nad5-m3</i>      | curated             | curated             | 57                                 | 57                                       |
| m4          |        | <i>Da_nad5-m4</i>      | unambiguous         | curated             | 186                                | 186                                      |
|             |        | <i>Dp_nad5-m4</i>      | unambiguous         | unambiguous         | 183                                | 183                                      |
|             |        | <i>Ds_nad5-m4</i>      | curated             | unambiguous         | 183                                | 183                                      |
|             |        | <i>Re_nad5-m4</i>      | curated             | unambiguous         | 183                                | 183                                      |
| m5          |        | <i>Da_nad5-m5</i>      | curated             | unambiguous         | 136                                | 136                                      |
|             |        | <i>Dp_nad5-m5</i>      | unambiguous         | unambiguous         | 136                                | 136                                      |
|             |        | <i>Ds_nad5-m5</i>      | unambiguous         | unambiguous         | 136                                | 136                                      |
|             |        | <i>Re_nad5-m5</i>      | curated             | unambiguous         | 136                                | 136                                      |
| m6          |        | <i>Da_nad5-m6</i>      | unambiguous         | unambiguous         | 122                                | 122                                      |
|             |        | <i>Dp_nad5-m6</i>      | unambiguous         | curated             | 122                                | 122                                      |
|             |        | <i>Ds_nad5-m6</i>      | unambiguous         | curated             | 122                                | 122                                      |
|             |        | <i>Re_nad5-m6</i>      | unambiguous         | unambiguous         | 122                                | 122                                      |
| m7          |        | <i>Da_nad5-m7</i>      | unambiguous         | unambiguous         | 188                                | 195                                      |
|             |        | <i>Dp_nad5-m7</i>      | curated             | unambiguous         | 201                                | 201                                      |
|             |        | <i>Ds_nad5-m7</i>      | curated             | unambiguous         | 194                                | 201                                      |
|             |        | <i>Re_nad5-m7</i>      | curated             | curated             | 192                                | 192                                      |
| m8          |        | <i>Da_nad5-m8</i>      | unambiguous         | curated             | 84                                 | 84                                       |
|             |        | <i>Dp_nad5-m8</i>      | unambiguous         | unambiguous         | 90                                 | 90                                       |
|             |        | <i>Ds_nad5-m8</i>      | curated             | unambiguous         | 81                                 | 81                                       |
|             |        | <i>Re_nad5-m8</i>      | curated             | curated             | 87                                 | 87                                       |
| m9          |        | <i>Da_nad5-m9</i>      | curated             | curated             | 182                                | 182                                      |
|             |        | <i>Dp_nad5-m9</i>      | unambiguous         | curated             | 191                                | 191                                      |
|             |        | <i>Ds_nad5-m9</i>      | curated             | unambiguous         | 188                                | 188                                      |
|             |        | <i>Re_nad5-m9</i>      | curated             | curated             | 179                                | 179                                      |
| m10         |        | <i>Da_nad5-m10</i>     | curated             | curated             | 116                                | 116                                      |
|             |        | <i>Dp_nad5-m10</i>     | curated             | unambiguous         | 113                                | 113                                      |
|             |        | <i>Ds_nad5-m10</i>     | unambiguous         | unambiguous         | 125                                | 125                                      |
|             |        | <i>Re_nad5-m10</i>     | curated             | curated             | 104                                | 110                                      |
| m11         |        | <i>Da_nad5-m11</i>     | curated             | ambiguous_U_-1      | 48                                 | 73                                       |
|             |        | <i>Dp_nad5-m11</i>     | unambiguous         | ambiguous_U_-1      | 73                                 | 73                                       |
|             |        | <i>Ds_nad5-m11</i>     | curated             | curated             | 75                                 | 76                                       |
|             |        | <i>Re_nad5-m11</i>     | curated             | unambiguous         | 47                                 | 73                                       |
| <i>nad7</i> | m1     | <i>Da_nad7-m1</i>      | curated             | unambiguous         | 173                                | 173                                      |
|             |        | <i>Dp_nad7-m1</i>      | curated             | curated             | 173                                | 173                                      |
|             |        | <i>Ds_nad7-m1</i>      | curated_homology    | curated             | 173                                | 173                                      |
|             |        | <i>Re_nad7-m1</i>      | curated_homology    | curated             | 173                                | 173                                      |
| m2          |        | <i>Da_nad7-m2</i>      | unambiguous         | unambiguous         | 75                                 | 75                                       |
|             |        | <i>Dp_nad7-m2</i>      | curated             | unambiguous         | 75                                 | 75                                       |
|             |        | <i>Ds_nad7-m2</i>      | curated             | curated             | 75                                 | 75                                       |
|             |        | <i>Re_nad7-m2</i>      | curated             | curated             | 75                                 | 75                                       |
| m3          |        | <i>Da_nad7-m3</i>      | unambiguous         | unambiguous         | 133                                | 133                                      |
|             |        | <i>Dp_nad7-m3</i>      | unambiguous         | unambiguous         | 133                                | 133                                      |
|             |        | <i>Ds_nad7-m3</i>      | curated             | unambiguous         | 133                                | 133                                      |
|             |        | <i>Re_nad7-m3</i>      | curated             | curated             | 133                                | 133                                      |
| m4          |        | <i>Da_nad7-m4</i>      | unambiguous         | unambiguous         | 64                                 | 64                                       |
|             |        | <i>Dp_nad7-m4</i>      | unambiguous         | unambiguous         | 64                                 | 64                                       |
|             |        | <i>Ds_nad7-m4</i>      | unambiguous         | curated             | 64                                 | 64                                       |
|             |        | <i>Re_nad7-m4</i>      | curated             | curated             | 64                                 | 64                                       |
| m5          |        | <i>Da_nad7-m5</i>      | unambiguous         | unambiguous         | 192                                | 192                                      |
|             |        | <i>Dp_nad7-m5</i>      | unambiguous         | curated             | 192                                | 192                                      |
|             |        | <i>Ds_nad7-m5</i>      | curated             | unambiguous         | 186                                | 186                                      |
|             |        | <i>Re_nad7-m5</i>      | curated             | unambiguous         | 189                                | 189                                      |

| Gene | Module            | Module ID <sup>a</sup> | 5' end <sup>b</sup> | 3' end <sup>b</sup> | Gene module size <sup>c</sup> [bp] | Transcript module size <sup>d</sup> [bp] |
|------|-------------------|------------------------|---------------------|---------------------|------------------------------------|------------------------------------------|
| nad7 | m6                | <i>Da_nad7-m6</i>      | unambiguous         | curated             | 66                                 | 66                                       |
|      |                   | <i>Dp_nad7-m6</i>      | curated             | unambiguous         | 66                                 | 66                                       |
|      |                   | <i>Ds_nad7-m6</i>      | unambiguous         | unambiguous         | 66                                 | 66                                       |
|      |                   | <i>Re_nad7-m6</i>      | curated             | curated             | 66                                 | 66                                       |
|      | m7                | <i>Da_nad7-m7</i>      | curated             | curated             | 169                                | 169                                      |
|      |                   | <i>Dp_nad7-m7</i>      | unambiguous         | unambiguous         | 169                                | 169                                      |
|      |                   | <i>Ds_nad7-m7</i>      | unambiguous         | unambiguous         | 157                                | 157                                      |
|      |                   | <i>Re_nad7-m7</i>      | curated             | unambiguous         | 166                                | 166                                      |
|      | m8                | <i>Da_nad7-m8</i>      | curated             | curated             | 176                                | 176                                      |
|      |                   | <i>Dp_nad7-m8</i>      | unambiguous         | curated             | 182                                | 182                                      |
|      |                   | <i>Ds_nad7-m8</i>      | unambiguous         | unambiguous         | 179                                | 179                                      |
|      |                   | <i>Re_nad7-m8</i>      | unambiguous         | curated             | 185                                | 185                                      |
| m9   | <i>Da_nad7-m9</i> | curated                | ambiguous_U_-1      | 78                  | 78                                 |                                          |
|      | <i>Dp_nad7-m9</i> | curated                | ambiguous_UA_-2     | 79                  | 79                                 |                                          |
|      | <i>Ds_nad7-m9</i> | curated                | ambiguous_U_-1      | 78                  | 78                                 |                                          |
|      | <i>Re_nad7-m9</i> | curated                | ambiguous_UA_-2     | 79                  | 79                                 |                                          |
| nad8 | m1                | <i>Da_nad8-m1</i>      | curated_homology    | unambiguous         | 144                                | 144                                      |
|      |                   | <i>Dp_nad8-m1</i>      | curated             | unambiguous         | 144                                | 144                                      |
|      |                   | <i>Ds_nad8-m1</i>      | curated_homology    | unambiguous         | 150                                | 150                                      |
|      |                   | <i>Re_nad8-m1</i>      | curated_homology    | unambiguous         | 144                                | 144                                      |
|      | m2                | <i>Da_nad8-m2</i>      | unambiguous         | curated             | 153                                | 153                                      |
|      |                   | <i>Dp_nad8-m2</i>      | unambiguous         | curated             | 153                                | 153                                      |
|      |                   | <i>Ds_nad8-m2</i>      | unambiguous         | unambiguous         | 153                                | 153                                      |
|      |                   | <i>Re_nad8-m2</i>      | curated             | unambiguous         | 150                                | 150                                      |
|      | m3                | <i>Da_nad8-m3</i>      | curated             | curated             | 78                                 | 85                                       |
|      |                   | <i>Dp_nad8-m3</i>      | curated             | unambiguous         | 72                                 | 84                                       |
|      |                   | <i>Ds_nad8-m3</i>      | unambiguous         | curated             | 75                                 | 76                                       |
|      |                   | <i>Re_nad8-m3</i>      | unambiguous         | curated             | 81                                 | 89                                       |
| rnl  | m1                | <i>Da_rnl-m1</i>       | curated             | unambiguous         | 542                                | 568                                      |
|      |                   | <i>Dp_rnl-m1</i>       | curated             | curated             | 534                                | 560                                      |
|      |                   | <i>Ds_rnl-m1</i>       | curated_homology    | unambiguous         | 521                                | 546                                      |
|      |                   | <i>Re_rnl-m1</i>       | curated_homology    | ambiguous_U_-1      | 525                                | 555                                      |
|      | m2                | <i>Da_rnl-m2</i>       | curated             | curated             | 352                                | 352                                      |
|      |                   | <i>Dp_rnl-m2</i>       | curated             | curated             | 352                                | 352                                      |
|      |                   | <i>Ds_rnl-m2</i>       | ambiguous_U_+1      | curated             | 339                                | 339                                      |
|      |                   | <i>Re_rnl-m2</i>       | unambiguous         | curated             | 340                                | 340                                      |
| rns  | m1                | <i>Da_rns-m1</i>       | curated             | curated             | 372                                | 381                                      |
|      |                   | <i>Dp_rns-m1</i>       | curated             | curated             | 366                                | 374                                      |
|      |                   | <i>Ds_rns-m1</i>       | curated             | ambiguous_U_-1      | 386                                | 391                                      |
|      |                   | <i>Re_rns-m1</i>       | curated_homology    | unambiguous         | 363                                | 372                                      |
| y1   | m1                | <i>Da_y1-m1</i>        | curated_homology    | curated             | 241                                | 241                                      |
|      |                   | <i>Dp_y1-m1</i>        | curated             | unambiguous         | 241                                | 241                                      |
|      |                   | <i>Ds_y1-m1</i>        | curated_homology    | unambiguous         | 244                                | 244                                      |
|      |                   | <i>Re_y1-m1</i>        | curated_homology    | unambiguous         | 241                                | 241                                      |
|      | m2                | <i>Da_y1-m2</i>        | curated             | curated             | 77                                 | 97                                       |
|      |                   | <i>Dp_y1-m2</i>        | unambiguous         | ambiguous_U_-1      | 101                                | 105                                      |
|      |                   | <i>Ds_y1-m2</i>        | unambiguous         | ambiguous_U_-3      | 100                                | 102                                      |
|      |                   | <i>Re_y1-m2</i>        | curated             | curated             | 83                                 | 94                                       |
| y2   | m1                | <i>Da_y2-m1</i>        | curated_homology    | curated             | 241                                | 241                                      |
|      |                   | <i>Dp_y2-m1</i>        | curated_homology    | unambiguous         | 235                                | 235                                      |
|      |                   | <i>Ds_y2-m1</i>        | curated_homology    | curated             | 244                                | 244                                      |
|      |                   | <i>Re_y2-m1</i>        | curated_homology    | curated             | 242                                | 242                                      |
|      | m2                | <i>Da_y2-m2</i>        | curated             | curated             | 97                                 | 97                                       |
|      |                   | <i>Dp_y2-m2</i>        | unambiguous         | curated             | 94                                 | 94                                       |

| Gene | Module | Module ID <sup>a</sup> | 5' end <sup>b</sup> | 3' end <sup>b</sup> | Gene module size <sup>c</sup> [bp] | Transcript module size <sup>d</sup> [bp] |
|------|--------|------------------------|---------------------|---------------------|------------------------------------|------------------------------------------|
|      |        | <i>Ds_y2-m2</i>        | curated             | unambiguous         | 73                                 | 73                                       |
|      |        | <i>Re_y2-m2</i>        | curated             | unambiguous         | 78                                 | 78                                       |
|      | m3     | <i>Da_y2-m3</i>        | curated             | unambiguous         | 93                                 | 111                                      |
|      |        | <i>Dp_y2-m3</i>        | curated             | ambiguous_U_-1      | 97                                 | 115                                      |
|      |        | <i>Ds_y2-m3</i>        | curated             | unambiguous         | 96                                 | 115                                      |
|      |        | <i>Re_y2-m3</i>        | unambiguous         | ambiguous_U_-1      | 97                                 | 115                                      |
|      | m4     | <i>Da_y2-m4</i>        | curated             | ambiguous_U_-1      | 68                                 | 68                                       |
|      |        | <i>Dp_y2-m4</i>        | unambiguous         | unambiguous         | 53                                 | 64                                       |
|      |        | <i>Ds_y2-m4</i>        | curated             | unambiguous         | 62                                 | 67                                       |
|      |        | <i>Re_y2-m4</i>        | unambiguous         | curated             | 58                                 | 64                                       |
| y3   | m1     | <i>Da_y3-m1</i>        | curated_homology    | unambiguous         | 179                                | 179                                      |
|      |        | <i>Dp_y3-m1</i>        | curated             | unambiguous         | 194                                | 194                                      |
|      |        | <i>Re_y3-m1</i>        | curated_homology    | curated             | 170                                | 170                                      |
|      | m1m2   | <i>Ds_y3-m1m2</i>      | curated_homology    | unambiguous         | 285                                | 285                                      |
|      | m2     | <i>Da_y3-m2</i>        | unambiguous         | unambiguous         | 109                                | 109                                      |
|      |        | <i>Dp_y3-m2</i>        | unambiguous         | curated             | 109                                | 109                                      |
|      |        | <i>Re_y3-m2</i>        | curated             | unambiguous         | 106                                | 106                                      |
|      |        | <i>Da_y3-m3</i>        | unambiguous         | unambiguous         | 141                                | 168                                      |
|      | m3     | <i>Dp_y3-m3</i>        | curated             | unambiguous         | 141                                | 168                                      |
|      |        | <i>Ds_y3-m3</i>        | unambiguous         | unambiguous         | 140                                | 168                                      |
|      |        | <i>Re_y3-m3</i>        | unambiguous         | ambiguous_U_-1      | 144                                | 171                                      |
|      | m4     | <i>Da_y3-m4</i>        | curated             | ambiguous_U_-1      | 360                                | 375                                      |
|      |        | <i>Dp_y3-m4</i>        | unambiguous         | ambiguous_U_-1      | 368                                | 384                                      |
|      |        | <i>Ds_y3-m4</i>        | unambiguous         | curated             | 368                                | 384                                      |
|      |        | <i>Re_y3-m4</i>        | unambiguous         | ambiguous_U_-1      | 367                                | 381                                      |
|      | m5     | <i>Da_y3-m5</i>        | curated             | unambiguous         | 133                                | 136                                      |
|      |        | <i>Dp_y3-m5</i>        | unambiguous         | unambiguous         | 126                                | 127                                      |
|      |        | <i>Ds_y3-m5</i>        | unambiguous         | ambiguous_U_-1      | 129                                | 136                                      |
|      |        | <i>Re_y3-m5</i>        | unambiguous         | ambiguous_U_-1      | 128                                | 130                                      |
| y5   | m1     | <i>Da_y5-m1</i>        | curated_homology    | ambiguous_U_-1      | 186                                | 236                                      |
|      |        | <i>Dp_y5-m1</i>        | curated             | unambiguous         | 195                                | 245                                      |
|      |        | <i>Ds_y5-m1</i>        | curated_homology    | ambiguous_U_-1      | 198                                | 248                                      |
|      |        | <i>Re_y5-m1</i>        | curated_homology    | unambiguous         | 194                                | 242                                      |
|      | m2     | <i>Da_y5-m2</i>        | unambiguous         | curated             | 109                                | 109                                      |
|      |        | <i>Dp_y5-m2</i>        | unambiguous         | unambiguous         | 109                                | 109                                      |
|      |        | <i>Ds_y5-m2</i>        | curated             | unambiguous         | 121                                | 121                                      |
|      |        | <i>Re_y5-m2</i>        | ambiguous_U_+1      | unambiguous         | 109                                | 109                                      |
|      | m3     | <i>Da_y5-m3</i>        | curated             | curated             | 39                                 | 55                                       |
|      |        | <i>Dp_y5-m3</i>        | unambiguous         | ambiguous_A_-1      | 57                                 | 62                                       |
|      |        | <i>Ds_y5-m3</i>        | unambiguous         | curated             | 36                                 | 56                                       |
|      |        | <i>Re_y5-m3</i>        | unambiguous         | ambiguous_U_-1      | 56                                 | 58                                       |
| y6   | m1     | <i>Da_y6-m1</i>        | curated             | unambiguous         | 192                                | 192                                      |
|      |        | <i>Dp_y6-m1</i>        | curated             | unambiguous         | 192                                | 192                                      |
|      |        | <i>Ds_y6-m1</i>        | curated_homology    | curated             | 192                                | 192                                      |
|      |        | <i>Re_y6-m1</i>        | curated_homology    | unambiguous         | 188                                | 188                                      |
|      | m2     | <i>Da_y6-m2</i>        | unambiguous         | curated             | 45                                 | 45                                       |
|      |        | <i>Dp_y6-m2</i>        | unambiguous         | unambiguous         | 43                                 | 49                                       |
|      |        | <i>Ds_y6-m2</i>        | curated             | curated_homology    | 45                                 | 45                                       |
|      |        | <i>Re_y6-m2</i>        | curated             | curated_homology    | 46                                 | 46                                       |

<sup>a</sup> Module ID consists of species abbreviation, gene name, and module number. Da, *D. ambulator*; Dp, *D. papillatum*; Ds, *D. sp. 2*; Re, *R. euleioides*.

<sup>b</sup> Terminal nucleotide of a module was inferred: i) from sequence alone ('unambiguous'); ii) experimentally ('curated'); iii) based on the homology to other species ('curated\_homology'). Remaining, ambiguous termini

(‘ambiguous’) are labelled according to the nucleotide residue, whose origin (genome-encoded or post-transcriptionally added) could not be determined (U, uridine; A, adenosine). The number and its sign indicate the maximum distance and orientation, respectively, of the shift. For example, in the case of *Da\_atp6-m3*, ‘ambiguous\_U\_-2’ means that the last two Us could be either genome-encoded, or appended, with the indicated size (e.g. 143 bp) corresponding to the default situation where the two Us are genome-encoded; when the two Us are appended by RNA editing, the true size of the module would be 141 bp (=143-2).

<sup>c</sup> Size of the module’s coding portion (excluding 5’ UTR and 3’ UTR).

<sup>d</sup> Size of the mature module transcript, including the appended Us (all modules) and 3’ UTR (only last modules). Adenosine residues added by polyadenylation and 5’ UTR of the first modules are not counted. UTR length has been precisely determined for all genes from *D. papillatum* except for *y2*, but only for a few genes from the other species (for details, compare ‘curated’ and ‘curated\_homology’ in the column ‘5’ end’ of m1).



**Supplementary Table S2.** Characterization of diplonemid mitochondrial chromosomes.

| Species             | Chromosome name <sup>a</sup> | Module(s)                                        | Cassette subclass <sup>b</sup> | Mean coverage <sup>c</sup> | GenBank Acc. Nr.      |
|---------------------|------------------------------|--------------------------------------------------|--------------------------------|----------------------------|-----------------------|
| <i>D. ambulator</i> | A01 (4,875)                  | <i>cox1-m9</i>                                   | a1                             | 10150.2                    | JF698651,<br>MF436754 |
| ( <i>Da</i> )       | A02                          | <i>rnl-m2</i>                                    | a2                             | 10401.8                    | MF436783              |
|                     | A02                          | <i>nad1-m5, y2-m3</i>                            | a2*                            | 11061.4                    | MF436783              |
|                     | A03                          | <i>cox1-m1</i>                                   | a1                             | 4727.7                     | JF698675,<br>MF436748 |
|                     | A04                          | <i>cox1-m3</i>                                   | a2                             | 8900.1                     | JF698677,<br>MF436750 |
|                     | A05                          | <i>rns-m1</i>                                    | a2                             | 28480.9                    | MF436784              |
|                     | A06                          | <i>rnl-m1</i>                                    | a2                             | 25131.6                    | MF436782              |
|                     | A07                          | <i>y6-m1</i>                                     | a1                             | 1819.7                     | MF436789              |
|                     | A08                          | <i>y3-m4</i>                                     | a1                             | 11564.6                    | MF436787              |
|                     | A09                          | <i>y1-m1</i>                                     | a1                             | 18087.5                    | MF436785              |
|                     | A10                          | <i>cob-m2, y2-m4</i>                             | a1                             | 14939.2                    | MF436745              |
|                     | A11                          | <i>nad7-m3, y2-m2, y5-m3</i>                     | a1                             | 5815.7                     | MF436773              |
|                     | A12                          | <i>cox2-m4</i>                                   | a2                             | 2875.7                     | MF436758              |
|                     | A13                          | <i>nad4-m8</i>                                   | a2                             | 587.7                      | MF436765              |
|                     | A14                          | <i>nad7-m4</i>                                   | a1                             | 10807.6                    | MF436774              |
|                     | B01 (4,959)                  | <i>cox1-m4</i>                                   | b                              | 5631.0                     | JF698653,<br>MF436751 |
|                     | B02                          | <i>cox2-m1, cox1-m8</i>                          | b                              | 11250.9                    | JF698680,<br>MF436755 |
|                     | B03                          | <i>nad5-m9</i>                                   | b                              | 15026.8                    | MF436769              |
|                     | B04                          | <i>cob-m1</i>                                    | b                              | 6783.1                     | MF436744              |
|                     | B05                          | <i>nad5-m1</i>                                   | b                              | 1713.4                     | MF436766              |
|                     | B06                          | <i>atp6-m2</i>                                   | b                              | 6966.6                     | MF436742              |
|                     | B07                          | <i>cox1-m7</i>                                   | b                              | 3556.2                     | JF698679,<br>MF436753 |
|                     | C01                          | <i>nad8-m1, nad4-m2, cox3-m2</i>                 | c1                             | 2681.6                     | MF436779              |
|                     | C02                          | <i>cox3-m3</i>                                   | c1                             | 4234.8                     | MF436759              |
|                     | C03                          | <i>nad8-m3, nad5-m4, atp6-m1, y2-m1</i>          | c1                             | 2978.1                     | MF436781              |
|                     | C04                          | <i>nad5-m3, nad5-m10</i>                         | c1                             | 2243.6                     | MF436767              |
|                     | C04                          | <i>nad5-m11</i>                                  | c2                             | 2488.4                     | MF436770              |
|                     | C05                          | <i>nad7-m2, nad5-m2, nad4-m5, cox1-m6, y1-m2</i> | c1                             | 4973.1                     | JF698678,<br>MF436772 |
|                     | C05                          | <i>X5</i>                                        | c2                             | 3263.8                     | MF436794              |
|                     | C06                          | <i>nad8-m2, nad5-m7</i>                          | c1                             | 2130.0                     | MF436780              |
|                     | C07                          | <i>y3-m5</i>                                     | c1                             | 4891.0                     | MF436788              |
|                     | C07                          | <i>nad1-m2</i>                                   | c2                             | 4544.3                     | MF436760              |
|                     | C08                          | <i>y3-m1</i>                                     | c1                             | 2981.2                     | MF436786              |
|                     | C09                          | <i>cox2-m2, y3-m2</i>                            | c1                             | 2334.7                     | MF436756              |
|                     | C10                          | <i>nad7-m7</i>                                   | c1                             | 5777.7                     | MF436776              |
|                     | C11                          | <i>nad7-m8</i>                                   | c1                             | 1744.4                     | MF436777              |
|                     | C12                          | <i>nad4-m4, y5-m2, y6-m2</i>                     | c1                             | 2975.4                     | MF436764              |
|                     | C12                          | <i>atp6-m3</i>                                   | c2                             | 2637.2                     | MF436743              |
|                     | C13                          | <i>nad1-m4</i>                                   | c1                             | 4983.7                     | MF436762              |
|                     | C14                          | <i>cob-m4, cob-m5</i>                            | c1                             | 5246.4                     | MF436747              |
|                     | C*                           | <i>cob-m3</i>                                    | c2                             | 2446.7                     | MF436746              |
|                     | C*                           | <i>cox1-m2</i>                                   | c2                             | 2709.1                     | JF698676,<br>MF436749 |
|                     | C*                           | <i>cox2-m3</i>                                   | c2                             | 1971.1                     | MF436757              |
|                     | C*                           | <i>nad5-m6</i>                                   | c2                             | 5089.2                     | MF436768              |
|                     | C*                           | <i>nad7-m1</i>                                   | c2                             | 4801.5                     | MF436771              |

| Species         | Chromosome name <sup>a</sup> | Module(s)                                                  | Cassette subclass <sup>b</sup> | Mean coverage <sup>c</sup> | GenBank Acc. Nr.   |
|-----------------|------------------------------|------------------------------------------------------------|--------------------------------|----------------------------|--------------------|
|                 | C*                           | <i>X1</i>                                                  | c2                             | 3709.9                     | MF436790           |
|                 | C*                           | <i>X2</i>                                                  | c2                             | 4296.8                     | MF436791           |
|                 | C*                           | <i>X3</i>                                                  | c2                             | 1649.6                     | MF436792           |
|                 | C*                           | <i>X4</i>                                                  | c2                             | 5072.4                     | MF436793           |
|                 | C*                           | <i>X6</i>                                                  | c2                             | 726.4                      | MF436795           |
|                 | U01                          | <i>nad1-m3, nad7-m6</i>                                    |                                | 6003.7                     | MF436761           |
|                 | U01                          | <i>nad5-m8, nad5-m5, nad4-m7, nad1-m1, cox3-m1, cob-m6</i> |                                | 6387.3                     | MF436761           |
|                 | U02 (4,593)                  | <i>cox1-m5, nad4-m3</i>                                    |                                | 12456.2                    | JF698652, MF436752 |
|                 | U02 (4,593)                  | <i>y3-m3, y5-m1</i>                                        |                                | 11874.2                    | JF698652, MF436752 |
|                 | U03                          | <i>nad7-m9, nad4-m6</i>                                    |                                | 5542.5                     | MF436778           |
|                 | U04                          | <i>nad7-m5</i>                                             |                                | 4818.0                     | MF436775           |
|                 | U05                          | <i>nad4-m1</i>                                             |                                | 1973.7                     | MF436763           |
| <i>D. sp. 2</i> | A01 (5,184)                  | <i>cox1-m9, nad5-m3</i>                                    | a4                             | 479.5                      | JF698654, MF436810 |
| <i>(Ds_)</i>    | A02 (5,163)                  | <i>cox1-m5</i>                                             | a3                             | 347.1                      | JF698655, MF436808 |
|                 | A03                          | <i>nad7-m2</i>                                             | a4*                            | 1489.1                     | MF436839           |
|                 | A04                          | <i>cox3-m2</i>                                             | a1*                            | 2408.6                     | MF436816           |
|                 | A05                          | <i>y6-m2</i>                                               | a2*                            | 4657.6                     | MF436864           |
|                 | A06                          | <i>nad7-m1</i>                                             | a1*                            | 1503                       | MF436838           |
|                 | A07                          | <i>nad5-m7</i>                                             | a2                             | 2627.2                     | MF436834           |
|                 | A08                          | <i>cob-m1</i>                                              | a3                             | 8631.3                     | MF436799           |
|                 | A09                          | <i>nad4-m2</i>                                             | a1                             | 3705.6                     | MF436824           |
|                 | A10                          | <i>nad4-m1</i>                                             | a1                             | 768.7                      | MF436823           |
|                 | A11                          | <i>nad5-m5</i>                                             | a2                             | 2047.5                     | MF436832           |
|                 | A12                          | <i>nad1-m4</i>                                             | a2                             | 2697.4                     | MF436821           |
|                 | A13                          | <i>cob-m5</i>                                              | a1                             | 1055.9                     | MF436803           |
|                 | A14                          | <i>y1-m1</i>                                               | a1                             | 155.4                      | MF436854           |
|                 | A15                          | <i>cob-m2</i>                                              | a1                             | 831.8                      | MF436800           |
|                 | A16                          | <i>atp6-m3</i>                                             | a4*                            | 7254.9                     | MF436798           |
|                 | A17                          | <i>nad1-m1</i>                                             | a1                             | 392.1                      | MF436818           |
|                 | A18                          | <i>nad1-m5</i>                                             | a1                             | 1094.8                     | MF436822           |
|                 | A19                          | <i>nad7-m8</i>                                             | a3                             | 988.8                      | MF436843           |
|                 | A20                          | <i>cox2-m1</i>                                             | a1                             | 1139.7                     | MF436811           |
|                 | A21                          | <i>nad7-m4</i>                                             | a4*                            | 1941.4                     | MF436840           |
|                 | A22                          | <i>nad8-m2</i>                                             | a1*                            | 414.2                      | MF436846           |
|                 | A23                          | <i>nad5-m4</i>                                             | a1                             | 712.8                      | MF436831           |
|                 | A24                          | <i>y2-m1</i>                                               | a1                             | 7811.6                     | MF436856           |
|                 | A25                          | <i>cox3-m3</i>                                             | a1                             | 464.8                      | MF436817           |
|                 | A26                          | <i>cox1-m1</i>                                             | a2                             | 202.4                      | JF698658, MF436804 |
|                 | A27                          | <i>nad8-m1</i>                                             | a3                             | 1211.1                     | MF436845           |
|                 | A28                          | <i>nad4-m8</i>                                             | a1                             | 1396.7                     | MF436828           |
|                 | A29                          | <i>nad5-m9</i>                                             | a1                             | 7425.5                     | MF436836           |
|                 | A30                          | <i>nad1-m3</i>                                             | a1                             | 1124.1                     | MF436820           |
|                 | A31                          | <i>nad4-m6</i>                                             | a2                             | 8737.7                     | MF436827           |
|                 | A32                          | <i>y2-m4</i>                                               | a1                             | 19898.9                    | MF436858           |
|                 | A33                          | <i>cox2-m3, cox1-m7</i>                                    | a1                             | 4163.9                     | JF698662, MF436813 |
|                 | A34                          | <i>cob-m4</i>                                              | a4                             | 332                        | MF436802           |
|                 | A35                          | <i>X3</i>                                                  | a4*                            | 1273.1                     | MF436852           |
|                 | A36                          | <i>y5-m1</i>                                               | a1                             | 2060                       | MF436861           |
|                 | A37                          | <i>nad7-m7</i>                                             | a3                             | 755.6                      | MF436842           |
|                 | A38                          | <i>nad1-m2</i>                                             | a1                             | 619.2                      | MF436819           |
|                 | A39                          | <i>y6-m1</i>                                               | a4                             | 1684.6                     | MF436863           |

| Species                      | Chromosome name <sup>a</sup> | Module(s)                         | Cassette subclass <sup>b</sup> | Mean coverage <sup>c</sup> | GenBank Acc. Nr.      |
|------------------------------|------------------------------|-----------------------------------|--------------------------------|----------------------------|-----------------------|
|                              | A40                          | <i>nad8-m3</i>                    | a2                             | 8364.5                     | MF436847              |
|                              | A41                          | <i>nad5-m8</i>                    | a4                             | 2288.7                     | MF436835              |
|                              | A42                          | <i>atp6-m1</i>                    | a3                             | 10697.6                    | MF436796              |
|                              | A43                          | <i>X4</i>                         | a4*                            | 1140.2                     | MF436853              |
|                              | B01                          | <i>y3-m4</i>                      | b                              | 7715.6                     | MF436860              |
|                              | B02                          | <i>nad7-m5</i>                    | b                              | 9931.5                     | MF436841              |
|                              | B03                          | <i>cox3-m1</i>                    | b                              | 7185.3                     | MF436815              |
|                              | B04                          | <i>cox1-m3</i>                    | b                              | 9401.9                     | JF698660,<br>MF436806 |
|                              | B05                          | <i>cox1-m6</i>                    | b                              | 10342.8                    | JF698661,<br>MF436809 |
|                              | B06                          | <i>cox2-m2</i>                    | b                              | 10024.3                    | MF436812              |
|                              | B07                          | <i>nad4-m5, cox1-m8</i>           | b                              | 7159.1                     | JF698663,<br>MF436826 |
|                              | B08                          | <i>nad5-m2</i>                    | b                              | 6114.4                     | MF436830              |
|                              | B09                          | <i>y3-m3, y5-m3</i>               | b                              | 8785                       | MF436859              |
|                              | B10                          | <i>nad5-m10</i>                   | b                              | 6286.9                     | MF436837              |
|                              | B11                          | <i>y1-m2</i>                      | b                              | 6310.6                     | MF436855              |
|                              | B12                          | <i>nad7-m9</i>                    | b                              | 8868.9                     | MF436844              |
|                              | C01                          | <i>cob-m3</i>                     | c                              | 4838.9                     | MF436801              |
|                              | C02                          | <i>cox1-m2</i>                    | c                              | 3001.9                     | JF698659,<br>MF436805 |
|                              | C03                          | <i>nad4-m3</i>                    | c                              | 5710.9                     | MF436825              |
|                              | C04                          | <i>X2</i>                         | c                              | 1202.3                     | MF436851              |
|                              | C05                          | <i>X1</i>                         | c                              | 311.0                      | MF436850              |
|                              | D01                          | <i>rns-m1</i>                     | d                              | 3076.4                     | MF436849              |
|                              | D02                          | <i>cox2-m4</i>                    | d                              | 4288.2                     | MF436814              |
|                              | D03                          | <i>rnl-m1</i>                     | d                              | 4857.4                     | MF436848              |
|                              | U01                          | <i>cox1-m4, nad4-m4, y3-m1m2</i>  |                                | 1081.3                     | JF698656,<br>MF436807 |
|                              | U01                          | <i>rnl-m2</i>                     |                                | 1132.5                     | JF698656,<br>MF436807 |
|                              | U02 (7,130)                  | <i>y2-m2, cob-m6</i>              |                                | 838.6                      | MF436857              |
|                              | U03 (6,059)                  | <i>y5-m2</i>                      |                                | 731.8                      | MF436862              |
|                              | U04 (5,770)                  | <i>nad5-m1</i>                    |                                | 911.7                      | MF436829              |
|                              | U05 (5,388)                  | <i>atp6-m2, nad7-m6, y2-m3</i>    |                                | 1105.6                     | MF436797              |
|                              | U05 (5,388)                  | <i>y3-m5</i>                      |                                | 1048.8                     | MF436797              |
|                              | U06                          | <i>nad5-m6, nad7-m3, nad5-m11</i> |                                | 2129.8                     | MF436833              |
|                              | U06                          | <i>nad4-m7</i>                    |                                | 1872.6                     | MF436833              |
| <i>R. euleeides</i><br>(Re ) | A01                          | <i>rnl-m1</i>                     | a3*                            | 8091.7                     | MF436917              |
|                              | A02                          | <i>nad5-m1</i>                    | a3                             | 4102.5                     | MF436897              |
|                              | A03                          | <i>nad5-m9</i>                    | a2                             | 5043.4                     | MF436904              |
|                              | A04                          | <i>cox1-m2</i>                    | a1                             | 1115.8                     | JF698670,<br>MF436874 |
|                              | A05                          | <i>nad5-m11</i>                   | a3                             | 1898.2                     | MF436906              |
|                              | A06                          | <i>cob-m3</i>                     | a2                             | 577.8                      | MF436869              |
|                              | A07                          | <i>nad1-m2</i>                    | a2                             | 6472.0                     | MF436887              |
|                              | A08                          | <i>rns-m1</i>                     | a3                             | 8738.5                     | MF436919              |
|                              | A09                          | <i>y5-m1</i>                      | a1                             | 3839.8                     | MF436928              |
|                              | A10                          | <i>y3-m4</i>                      | a3                             | 262.1                      | MF436926              |
|                              | A11                          | <i>nad1-m3</i>                    | a3                             | 11530.7                    | MF436888              |
|                              | A12                          | <i>cox2-m2</i>                    | a1                             | 932.6                      | MF436881              |
|                              | A13                          | <i>cox3-m1</i>                    | a3                             | 1895.2                     | MF436883              |
|                              | A14                          | <i>nad8-m2</i>                    | a1                             | 5529.7                     | MF436915              |
|                              | A15                          | <i>nad7-m1</i>                    | a1                             | 899.9                      | MF436907              |
|                              | A16                          | <i>y3-m3</i>                      | a3                             | 4073.1                     | MF436925              |
|                              | A17                          | <i>y3-m1</i>                      | a3                             | 4270.5                     | MF436924              |
|                              | A18                          | <i>nad5-m8, nad4-m2</i>           | a3                             | 2767.0                     | MF436903              |

| Species              | Chromosome name <sup>a</sup> | Module(s)                               | Cassette subclass <sup>b</sup> | Mean coverage <sup>c</sup> | GenBank Acc. Nr.      |
|----------------------|------------------------------|-----------------------------------------|--------------------------------|----------------------------|-----------------------|
|                      | A19                          | <i>nad7-m8</i>                          | a1                             | 21966.9                    | MF436913              |
|                      | A20                          | <i>cob-m4</i>                           | a1                             | 1269.4                     | MF436870              |
|                      | A21                          | <i>y2-m3, y2-m4</i>                     | a1                             | 355.1                      | MF436923              |
|                      | A22                          | <i>nad5-m6</i>                          | a1                             | 16173.2                    | MF436901              |
|                      | A23                          | <i>y3-m5</i>                            | a1                             | 1041.5                     | MF436927              |
|                      | A24                          | <i>nad1-m5</i>                          | a3                             | 9795.8                     | MF436890              |
|                      | A25                          | <i>cob-m5, y5-m3</i>                    | a3                             | 978.2                      | MF436871              |
|                      | A26                          | <i>y5-m2</i>                            | a3                             | 717.6                      | MF436929              |
|                      | A27                          | <i>cob-m6</i>                           | a3                             | 555.6                      | MF436872              |
|                      | A28                          | <i>atp6-m3</i>                          | a2                             | 675.7                      | MF436866              |
|                      | A29                          | <i>cox3-m2</i>                          | a3                             | 536.4                      | MF436884              |
|                      | A30                          | <i>cox1-m3</i>                          | a3                             | 542.8                      | JF698671,<br>MF436875 |
|                      | A31                          | <i>cox1-m4</i>                          | a1                             | 277.7                      | JF698667,<br>MF436876 |
|                      | A32                          | <i>nad4-m1, y1-m2</i>                   | a3                             | 5322.2                     | MF436891              |
|                      | A33                          | <i>cox1-m9</i>                          | a3                             | 868.0                      | JF698664,<br>MF436879 |
|                      | A34                          | <i>y1-m1</i>                            | a3                             | 4980.2                     | MF436920              |
|                      | A35                          | <i>cox2-m1</i>                          | a3                             | 1158.4                     | MF436880              |
|                      | A36                          | <i>nad1-m4</i>                          | a3                             | 1659.6                     | MF436889              |
|                      | A37                          | <i>y2-m1</i>                            | a3                             | 772.8                      | MF436921              |
|                      | A38                          | <i>cox3-m3</i>                          | a3                             | 2539.1                     | MF436885              |
|                      | A39                          | <i>nad7-m5</i>                          | a1                             | 497.8                      | MF436910              |
|                      | A40                          | <i>nad5-m2</i>                          | a3                             | 2232.5                     | MF436898              |
|                      | A41                          | <i>nad7-m7</i>                          | a3                             | 308.9                      | MF436912              |
|                      | A42                          | <i>cox1-m1</i>                          | a3                             | 4975.5                     | JF698669,<br>MF436873 |
|                      | A43                          | <i>y6-m1</i>                            | a3                             | 1051.9                     | MF436930              |
|                      | A44                          | <i>nad5-m7</i>                          | a3                             | 755.8                      | MF436902              |
|                      | A45                          | <i>nad5-m4</i>                          | a3                             | 4132.5                     | MF436900              |
|                      | A46                          | <i>cox1-m5</i>                          | a3                             | 7731.6                     | JF698666,<br>MF436877 |
|                      | A47                          | <i>nad4-m8</i>                          | a3                             | 1347.7                     | MF436896              |
|                      | A48                          | <i>cob-m1</i>                           | a3                             | 6201.6                     | MF436867              |
|                      | A49                          | <i>nad4-m4</i>                          | a1                             | 191.9                      | MF436893              |
|                      | A50                          | <i>nad4-m3</i>                          | a3                             | 1830.9                     | MF436892              |
|                      | A51                          | <i>cob-m2</i>                           | a3                             | 578.9                      | MF436868              |
|                      | A52                          | <i>nad7-m6</i>                          | a3                             | 1418.1                     | MF436911              |
|                      | B01                          | <i>nad8-m1, nad5-m5, cox2-m3</i>        | b                              | 1515.1                     | MF436914              |
|                      | B02                          | <i>nad5-m3, nad4-m5, y6-m2, atp6-m1</i> | b*                             | 1305.8                     | MF436899              |
|                      | B03                          | <i>nad8-m3, nad7-m4</i>                 | b                              | 1290.1                     | MF436916              |
|                      | B04                          | <i>nad4-m6</i>                          | b                              | 446.0                      | MF436894              |
|                      | B05                          | <i>cox1-m7</i>                          | b                              | 1340.3                     | JF698673,<br>MF436878 |
|                      | B06                          | <i>nad5-m10</i>                         | b                              | 813.0                      | MF436905              |
|                      | B07                          | <i>nad7-m2</i>                          | b                              | 841.6                      | MF436908              |
|                      | C01                          | <i>nad4-m7</i>                          | c                              | 15616.5                    | MF436895              |
|                      | C02                          | <i>atp6-m2</i>                          | c*                             | 4222.5                     | MF436865              |
|                      | C03                          | <i>rnl-m2</i>                           | c                              | 3165.0                     | MF436918              |
|                      | C04                          | <i>y2-m2, y3-m2</i>                     | c                              | 1337.0                     | MF436922              |
|                      | D01                          | <i>nad1-m1</i>                          | d                              | 1246.9                     | MF436886              |
|                      | D02                          | <i>nad7-m3, cox1-m8</i>                 | d                              | 1259.2                     | JF698674,<br>MF436909 |
|                      | U01                          | <i>cox2-m4, cox1-m6, nad7-m9</i>        |                                | 1292.3                     | JF698672,<br>MF436882 |
| <i>D. papillatum</i> | A01                          | <i>atp6-m1</i>                          | a                              | 2939.2                     | KU356490              |
| ( <i>Dp</i> )        | A02                          | <i>atp6-m2</i>                          | a                              | 686.4                      | KU356491              |

| Species | Chromosome name <sup>a</sup> | Module(s)              | Cassette subclass <sup>b</sup> | Mean coverage <sup>c</sup> | GenBank Acc. Nr.                   |
|---------|------------------------------|------------------------|--------------------------------|----------------------------|------------------------------------|
|         | A03                          | <i>atp6-m3</i>         | a                              | 8730.5                     | KU356492                           |
|         | A04                          | <i>cob-m1</i>          | a                              | 724.4                      | KU356493                           |
|         | A05                          | <i>cob-m2</i>          | a                              | 5114.5                     | KU356494                           |
|         | A06                          | <i>cob-m3</i>          | a                              | 6277.4                     | KU356495                           |
|         | A07                          | <i>cob-m4</i>          | a                              | 2562.3                     | KU356496                           |
|         | A08                          | <i>cob-m5</i>          | a                              | 2276.0                     | KU356497                           |
|         | A09                          | <i>cox1-m2</i>         | a                              | 4928.6                     | KU356500                           |
|         | A10                          | <i>cox1-m3</i>         | a                              | 21655.6                    | KU356501                           |
|         | A11                          | <i>cox1-m5</i>         | a                              | 1790.7                     | KU356503                           |
|         | A12                          | <i>cox1-m6</i>         | a                              | 1202.9                     | KU356504                           |
|         | A13                          | <i>cox1-m7</i>         | a                              | 549.2                      | KU356505                           |
|         | A14                          | <i>cox1-m8</i>         | a                              | 2060.5                     | KU356506                           |
|         | A15 (5,802;<br>5,852) †      | <i>cox1-m9</i>         | a                              | 10148.0                    | KU356507,<br>HQ288823,<br>EU123536 |
|         | A16                          | <i>cox2-m1</i>         | a                              | 9229.5                     | KU356508                           |
|         | A17                          | <i>cox2-m3</i>         | a                              | 994.3                      | KU356510                           |
|         | A18                          | <i>cox2-m4</i>         | a                              | 723.9                      | KU356511                           |
|         | A19                          | <i>cox3-m1</i>         | a                              | 5418.4                     | KU356512                           |
|         | A20                          | <i>cox3-m2</i>         | a                              | 2359.6                     | KU356513                           |
|         | A21                          | <i>cox3-m3</i>         | a                              | 7666.8                     | KU356514                           |
|         | A22                          | <i>nad1-m1</i>         | a                              | 7552.8                     | KU356515                           |
|         | A23                          | <i>nad1-m2</i>         | a                              | 12429.3                    | KU356516                           |
|         | A24                          | <i>nad1-m3</i>         | a                              | 4863.8                     | KU356517                           |
|         | A25                          | <i>nad1-m4</i>         | a                              | 4640.3                     | KU356518                           |
|         | A26                          | <i>nad1-m5</i>         | a                              | 7701.2                     | KU356519                           |
|         | A27                          | <i>nad4-m1</i>         | a                              | 14167.1                    | KU356520                           |
|         | A28                          | <i>nad4-m3</i>         | a                              | 5146.9                     | KU356522                           |
|         | A29                          | <i>nad4-m4</i>         | a                              | 4945.9                     | KU356523                           |
|         | A30                          | <i>nad4-m6</i>         | a                              | 8085.8                     | KU356525                           |
|         | A31                          | <i>nad4-m8</i>         | a                              | 4331.2                     | KU356527                           |
|         | A32                          | <i>nad5-m10, y5-m3</i> | a                              | 4856.4                     | KU356537                           |
|         | A33                          | <i>nad5-m11, y2-m2</i> | a                              | 8446.4                     | KU356538                           |
|         | A34                          | <i>nad5-m2</i>         | a                              | 6914.4                     | KU356529                           |
|         | A35                          | <i>nad5-m3</i>         | a                              | 1445.1                     | KU356530                           |
|         | A36                          | <i>nad5-m4</i>         | a                              | 1030.1                     | KU356531                           |
|         | A37                          | <i>nad5-m5</i>         | a                              | 868.2                      | KU356532                           |
|         | A38                          | <i>nad5-m6</i>         | a                              | 1514.6                     | KU356533                           |
|         | A39                          | <i>nad5-m7</i>         | a                              | 4044.9                     | KU356534                           |
|         | A40                          | <i>nad5-m8</i>         | a                              | 8618.5                     | KU356535                           |
|         | A41                          | <i>nad5-m9</i>         | a                              | 4039.5                     | KU356536                           |
|         | A42                          | <i>nad7-m1</i>         | a                              | 2336.1                     | KU356539                           |
|         | A43                          | <i>nad7-m2</i>         | a                              | 7340.5                     | KU356540                           |
|         | A44                          | <i>nad7-m3</i>         | a                              | 1773.4                     | KU356541                           |
|         | A45                          | <i>nad7-m5</i>         | a                              | 8342.8                     | KU356543                           |
|         | A46 (5,794)                  | <i>nad7-m6, y2-m3</i>  | a                              | 5970.0                     | KU356544,<br>HQ288824              |
|         | A47 (5,763)                  | <i>nad7-m8</i>         | a                              | 826.1                      | KU356546,<br>JQ302962              |
|         | A48                          | <i>nad7-m9</i>         | a                              | 843.1                      | KU356547                           |
|         | A49                          | <i>nad8-m1</i>         | a                              | 5728.1                     | KU356548                           |
|         | A50                          | <i>nad8-m3</i>         | a                              | 8262.4                     | KU356550                           |
|         | A51                          | <i>y1-m1</i>           | a                              | 4954.4                     | KU356554                           |
|         | A52                          | <i>y1-m2</i>           | a                              | 22343.9                    | KU356555                           |
|         | A53                          | <i>y2-m4</i>           | a                              | 2798.8                     | KU356557                           |
|         | A54                          | <i>y3-m1</i>           | a                              | 6392.6                     | KU356558                           |
|         | A55                          | <i>y3-m5</i>           | a                              | 10054.6                    | KU356562                           |
|         | A56                          | <i>y4-m1</i>           | a                              | 2222.5                     | KU356563                           |

| Species | Chromosome name <sup>a</sup> | Module(s)      | Cassette subclass <sup>b</sup> | Mean coverage <sup>c</sup> | GenBank Acc. Nr.      |
|---------|------------------------------|----------------|--------------------------------|----------------------------|-----------------------|
|         | A57                          | <i>y4-m2</i>   | a                              | 2322.4                     | KU356564              |
|         | A58                          | <i>y5-m1</i>   | a                              | 8032.7                     | KU356565              |
|         | A59                          | <i>y6-m2</i>   | a                              | 1146.5                     | KU356568              |
|         | A60                          | <i>X12-m</i>   | a                              | 1219.2                     | KU356569              |
|         | A61                          | <i>X18-m</i>   | a                              | 4213.1                     | KU356570              |
|         | B01                          | <i>cob-m6</i>  | b                              | 3069.1                     | KU356498              |
|         | B02                          | <i>cox1-m1</i> | b*                             | 2977.4                     | KU356499              |
|         | B03 (7,182)                  | <i>cox1-m4</i> | b                              | 10329.8                    | KU356502,<br>EU123537 |
|         | B04                          | <i>cox2-m2</i> | b                              | 1573.9                     | KU356509              |
|         | B05                          | <i>nad4-m2</i> | b*                             | 6250.0                     | KU356521              |
|         | B06                          | <i>nad4-m5</i> | b*                             | 1649.1                     | KU356524              |
|         | B07                          | <i>nad4-m7</i> | b                              | 6485.5                     | KU356526              |
|         | B08                          | <i>nad5-m1</i> | b                              | 1582.5                     | KU356528              |
|         | B09                          | <i>nad7-m4</i> | b*                             | 5688.5                     | KU356542              |
|         | B10                          | <i>nad7-m7</i> | b                              | 14312.6                    | KU356545              |
|         | B11                          | <i>nad8-m2</i> | b                              | 1878.6                     | KU356549              |
|         | B12                          | <i>rnl-m1</i>  | b*                             | 29748.1                    | KU356551              |
|         | B13                          | <i>rnl-m2</i>  | b                              | 10837.6                    | KU356552              |
|         | B14                          | <i>rns-m1</i>  | b                              | 8776.9                     | KU356553              |
|         | B15                          | <i>y2-m1</i>   | b*                             | 953.5                      | KU356556              |
|         | B16                          | <i>y3-m2</i>   | b                              | 689.4                      | KU356559              |
|         | B17                          | <i>y3-m3</i>   | b                              | 17358.5                    | KU356560              |
|         | B18                          | <i>y3-m4</i>   | b                              | 597.6                      | KU356561              |
|         | B19                          | <i>y5-m2</i>   | b                              | 1318.0                     | KU356566              |
|         | B20                          | <i>y6-m1</i>   | b                              | 5169.8                     | KU356567              |

<sup>a</sup> Chromosome name consists of a letter referring to the class (A-D, U) and an ordinal number. For a chromosome that was completely sequenced the length is indicated in parentheses. The c2 cassettes labeled with an asterisk most likely associate with one of the c1 cassettes to form a bi-cassette C-class chromosome (i.e., *Da\_C01-C03, C06, C08-C11, C13-C14*), but the exact partners have not been determined. Note that for chromosomes with two cassettes (or module arrays), the chromosome name is listed twice to separately show modules belonging to each cassette (or array). The dagger symbol indicates the chromosome, whose two alleles were completely sequenced (*Dp\_A15*).

<sup>b</sup> Cassettes are categorized according to their class (A-D, U) with a lowercase letter referring to the class and the number referring to a subclass, which is based on the variant cassette-framing motifs. The asterisk indicates a derived cassette (e.g., identity below 90% compared to the usual recurrent framing motif for that class either upstream, or downstream of the cassette).

<sup>c</sup> Mean coverage by sequencing reads was calculated for the entire length of a cassette or for a module array plus 50 bp upstream and downstream (see Methods for details). *D. papillatum* data were taken from <sup>1</sup>.

**Supplementary Table S3.** Editing sites in the mitochondrial genes of *D/R* diplomonads.

| Gene        | Species              | Nr. of U-<br>appendage sites <sup>a</sup> | U-tract<br>length [nt] | Nr. of substitution<br>clusters (Total edits) | Nr. of A-to-I<br>sites | Nr. of C-to-U<br>sites |
|-------------|----------------------|-------------------------------------------|------------------------|-----------------------------------------------|------------------------|------------------------|
| <i>atp6</i> | <i>D. ambulator</i>  | 0                                         | 0                      |                                               |                        |                        |
|             | <i>D. papillatum</i> | 0                                         | 0                      |                                               |                        |                        |
|             | <i>D. sp. 2</i>      | 1                                         | 3                      |                                               |                        |                        |
|             | <i>R. euleeides</i>  | n.d.                                      | n.d.                   |                                               |                        |                        |
| <i>cob</i>  | <i>D. ambulator</i>  | 1                                         | 3                      |                                               |                        |                        |
|             | <i>D. papillatum</i> | 1                                         | 3                      |                                               |                        |                        |
|             | <i>D. sp. 2</i>      | 0                                         | 0                      |                                               |                        |                        |
|             | <i>R. euleeides</i>  | 1                                         | 4                      |                                               |                        |                        |
| <i>cox1</i> | <i>D. ambulator</i>  | 1                                         | 6                      |                                               |                        |                        |
|             | <i>D. papillatum</i> | 1                                         | 6                      |                                               |                        |                        |
|             | <i>D. sp. 2</i>      | 1                                         | 6                      |                                               |                        |                        |
|             | <i>R. euleeides</i>  | 1                                         | 6                      |                                               |                        |                        |
| <i>cox2</i> | <i>D. ambulator</i>  | 1                                         | 2                      |                                               |                        |                        |
|             | <i>D. papillatum</i> | 1                                         | 3                      |                                               |                        |                        |
|             | <i>D. sp. 2</i>      | 1                                         | 3                      |                                               |                        |                        |
|             | <i>R. euleeides</i>  | 1                                         | 3                      |                                               |                        |                        |
| <i>cox3</i> | <i>D. ambulator</i>  | 0                                         | 0                      |                                               |                        |                        |
|             | <i>D. papillatum</i> | 1                                         | 1                      |                                               |                        |                        |
|             | <i>D. sp. 2</i>      | 0                                         | 0                      |                                               |                        |                        |
|             | <i>R. euleeides</i>  | 1                                         | 2                      |                                               |                        |                        |
| <i>nad1</i> | <i>D. ambulator</i>  | 1                                         | 15                     |                                               |                        |                        |
|             | <i>D. papillatum</i> | 1                                         | 16                     |                                               |                        |                        |
|             | <i>D. sp. 2</i>      | 1                                         | 17                     |                                               |                        |                        |
|             | <i>R. euleeides</i>  | 1                                         | 20                     |                                               |                        |                        |
| <i>nad4</i> | <i>D. ambulator</i>  | 1                                         | 2                      | 1 (15)                                        | 0                      | 15                     |
|             | <i>D. papillatum</i> | 1                                         | 2                      | 1 (29)                                        | 7                      | 22                     |
|             | <i>D. sp. 2</i>      | 1                                         | 2                      | 1 (14)                                        | 0                      | 14                     |
|             | <i>R. euleeides</i>  | 1                                         | 2                      | 1 (14)                                        | 1                      | 13                     |
| <i>nad5</i> | <i>D. ambulator</i>  | 2                                         | 7 + 25                 |                                               |                        |                        |
|             | <i>D. papillatum</i> | 0                                         | 0                      |                                               |                        |                        |
|             | <i>D. sp. 2</i>      | 2                                         | 7 + 1                  |                                               |                        |                        |
|             | <i>R. euleeides</i>  | 2                                         | 6 + 26                 |                                               |                        |                        |
| <i>nad7</i> | <i>D. ambulator</i>  |                                           |                        | 1 (4)                                         | 2                      | 2                      |
|             | <i>D. papillatum</i> |                                           |                        | 1 (1)                                         | 1                      | 0                      |
|             | <i>D. sp. 2</i>      |                                           |                        | 2 (4)                                         | 1 + 2                  | 1 + 0                  |
|             | <i>R. euleeides</i>  |                                           |                        | 2 (5)                                         | 2 + 0                  | 2 + 1                  |
| <i>nad8</i> | <i>D. ambulator</i>  |                                           |                        |                                               |                        |                        |
|             | <i>D. papillatum</i> |                                           |                        |                                               |                        |                        |
|             | <i>D. sp. 2</i>      |                                           |                        |                                               |                        |                        |
|             | <i>R. euleeides</i>  |                                           |                        |                                               |                        |                        |
| <i>rnl</i>  | <i>D. ambulator</i>  | 1                                         | 26                     |                                               |                        |                        |
|             | <i>D. papillatum</i> | 1                                         | 26                     |                                               |                        |                        |
|             | <i>D. sp. 2</i>      | 1                                         | 25                     |                                               |                        |                        |
|             | <i>R. euleeides</i>  | 1                                         | 30                     |                                               |                        |                        |
| <i>rns</i>  | <i>D. ambulator</i>  | 1                                         | 9                      | 1 (46)                                        | 22                     | 24                     |
|             | <i>D. papillatum</i> | 1                                         | 8                      | 1 (45)                                        | 15                     | 30                     |
|             | <i>D. sp. 2</i>      | 1                                         | 5                      | 1 (24)                                        | 11                     | 13                     |
|             | <i>R. euleeides</i>  | 1                                         | 9                      | 1 (47)                                        | 33                     | 14                     |
| <i>y1</i>   | <i>D. ambulator</i>  | 1                                         | 8                      | 0                                             | 0                      | 0                      |
|             | <i>D. papillatum</i> | 1                                         | 4                      | 1 (11)                                        | 4                      | 7                      |
|             | <i>D. sp. 2</i>      | 1                                         | 2                      | 1 (13)                                        | 5                      | 8                      |
|             | <i>R. euleeides</i>  | 0                                         | 0                      | 0                                             | 0                      | 0                      |
| <i>y2</i>   | <i>D. ambulator</i>  | 1                                         | 18                     | 1 (5)                                         | 4                      | 1                      |

| Gene         | Species              | Nr. of U-<br>appendage sites <sup>a</sup> | U-tract<br>length [nt] | Nr. of substitution<br>clusters (Total edits) | Nr. of A-to-I<br>sites | Nr. of C-to-U<br>sites |
|--------------|----------------------|-------------------------------------------|------------------------|-----------------------------------------------|------------------------|------------------------|
|              | <i>D. papillatum</i> | 2                                         | 18 + 11                | 1 (3)                                         | 1                      | 2                      |
|              | <i>D. sp. 2</i>      | 2                                         | 19 + 5                 | 1 (9)                                         | 8                      | 1                      |
|              | <i>R. euleeides</i>  | 2                                         | 18 + 6                 | 1 (3)                                         | 2                      | 1                      |
| y3           | <i>D. ambulator</i>  | 3                                         | 27 + 15 + 3            | 0                                             | 0                      | 0                      |
|              | <i>D. papillatum</i> | 3                                         | 27 + 16 + 1            | 1 (7)                                         | 1                      | 6                      |
|              | <i>D. sp. 2</i>      | 3                                         | 28 + 16 + 7            | 0                                             | 0                      | 0                      |
|              | <i>R. euleeides</i>  | 3                                         | 27 + 14 + 2            | 1 (7)                                         | 1                      | 6                      |
| y5           | <i>D. ambulator</i>  | 1                                         | 50                     | 1 (14)                                        | 0                      | 14                     |
|              | <i>D. papillatum</i> | 1                                         | 50                     | 1 (18)                                        | 0                      | 18                     |
|              | <i>D. sp. 2</i>      | 1                                         | 50                     | 1 (14)                                        | 4                      | 10                     |
|              | <i>R. euleeides</i>  | 2                                         | 48 + 2                 | 1 (22)                                        | 0                      | 22                     |
| y6           | <i>D. ambulator</i>  | n.d.                                      | n.d.                   |                                               |                        |                        |
|              | <i>D. papillatum</i> | 1                                         | 6                      |                                               |                        |                        |
|              | <i>D. sp. 2</i>      | n.d.                                      | n.d.                   |                                               |                        |                        |
|              | <i>R. euleeides</i>  | n.d.                                      | n.d.                   |                                               |                        |                        |
| <b>Total</b> | <i>D. ambulator</i>  | 15                                        | 216                    | 5 (84)                                        | 28                     | 56                     |
|              | <i>D. papillatum</i> | 16*                                       | 198*                   | 7 (114)                                       | 29                     | 85                     |
|              | <i>D. sp. 2</i>      | 16                                        | 196                    | 7 (78)                                        | 31                     | 47                     |
|              | <i>R. euleeides</i>  | 17                                        | 225                    | 7 (98)                                        | 39                     | 59                     |

<sup>a</sup> Asterisks indicate that U-appendage sites in the *y4* gene of *D. papillatum* (two sites; 28 nt and 12 nt long) were not taken into account, because the gene was not found in the other three species. n.d., not determined



**Supplementary Table S4.** Oligonucleotides used in this study.

| Oligonucleotide | Sequence (5' → 3')                                       | Target                               | Application      |
|-----------------|----------------------------------------------------------|--------------------------------------|------------------|
| CDS-III         | ATTCTAGAGGCCGAGGCCGCCGACATG (T) <sub>30</sub> VN         | poly-(A) RNAs                        | RT               |
| CDS-III-ter     | ATTCTAGAGGCCGAGGCC                                       | poly-(A) RNAs                        | PCR              |
| dp123           | GGCTTATCGGCGAAATTCACCTTCTG                               | dp124 (RNA)                          | 5'-RACE          |
| dp124 (RNA)     | rGrGrCrUrUrArUrCrGrGrCrGrArArArUrU<br>rCrArCrUrUrUrCrUrG | 5' phosphorylated RNAs               | 5'-RACE          |
| dp301           | TGTGGTGTACTGCTGGTATCAG                                   | <i>Dp_y5-m1</i>                      | PCR              |
| dp302           | CATAGCGTAGGTGCTCCGTAG                                    | <i>Dp_y5-m3</i>                      | PCR              |
| dp303           | GTTGTGGGTGCGTTAGTAGCA                                    | <i>Dp_y5-m1</i>                      | PCR              |
| dp304           | CATGGGATGTATGTACCGGG                                     | <i>Dp_y5-m2</i>                      | PCR              |
| da25            | GGCATAAGAACTGCAGCTACCTAT                                 | <i>Da_C05</i> chromosome             | PCR              |
| da26            | ATACATGGTAGCACACATGC                                     | <i>Da_C05</i> chromosome             | PCR              |
| da39            | GTGTAGAGGATAGCCATACATGCATT                               | <i>Da_rns-m1</i>                     | primer extension |
| da42            | TCGTAGCGATACATGCTCCTGT                                   | <i>Da_y5-m2</i>                      | PCR              |
| da43            | CTACTGCTAGTACGCTGTCTGCTA                                 | <i>Da_nad5-m9</i>                    | PCR              |
| da44            | GTAGTAGTAGAGGACAGCATAGCG                                 | <i>Da_y5-m3</i>                      | PCR              |
| da45            | ACTACAGCTACTGCCATGTGTG                                   | <i>Da_y5-m1</i>                      | PCR              |
| da46            | CCACAGCGTATATGCACTGCT                                    | <i>Da_A02</i> chromosome             | PCR              |
| da47            | TGGTAGGTGATGCCGTGTGCT                                    | <i>Da_A02</i> chromosome             | PCR              |
| da48            | CCAACAGAGGCTAGACGTGTG                                    | <i>Da_nad7-m5</i>                    | PCR              |
| da49            | TCTAGTGCTAGGCATACAGGGAC                                  | <i>Da_nad7-m5</i>                    | PCR              |
| da50            | GTAGCACAGACAGCAGGGCT                                     | <i>Da_y3-m4</i>                      | PCR              |
| da51            | CATTGCTCTCCCACATCCA                                      | <i>Da_cox1-m5</i>                    | PCR              |
| da52            | GTGAGCCGAATCTTTGGAGG                                     | <i>Da_U04</i> chromosome             | PCR              |
| da53            | TAAGGGTTGGTGTATGCCCTAGTG                                 | <i>Da_y3-m3</i>                      | PCR              |
| da54            | TGCTTCTGTGAGTCATGCCCTGT                                  | <i>Da_nad4-m3</i>                    | PCR              |
| da55            | GCGTTTATGCAGCAGTAG                                       | <i>Da_y3-m5</i>                      | PCR              |
| da56            | ACGCAGCACACGCTCTCC                                       | <i>Da_nad5-m10</i>                   | PCR              |
| da59            | TGGAGCCATCATGTGTGCC                                      | <i>Da_c2</i> -cassette<br>downstream | PCR              |
| da60            | GGAGAGCGTGTGCTGCGT                                       | <i>Da_nad5-m10</i>                   | PCR              |
| da61            | GTGTCCGTCTGCTGATGGAAAT                                   | <i>Da_c2</i> -cassette<br>upstream   | PCR              |
| ds52            | GAAGCATGTCTGGACAGTAAGGA                                  | <i>Ds_y3-m2</i>                      | RT-PCR           |
| ds53            | TGCGGACTGTGCTATGATAGTGT                                  | <i>Ds_y5-m1</i>                      | PCR              |
| ds54            | TGGACAGGAGCAAGACATCAGT                                   | <i>Ds_y5-m2</i>                      | PCR              |
| ds55            | GACTTAGGCAGCGTTGTCTTC                                    | <i>Ds_nad1-m4</i>                    | PCR              |
| re51            | GGTATCCGCACTAGCACCATCA                                   | <i>Re_y3-m4</i>                      | PCR              |
| re52            | GCCAATGATGCAACGCACACTA                                   | <i>Re_y3-m2</i>                      | RT-PCR           |
| re54            | CCACTGGGGATACACATAACCATC                                 | <i>Re_y2-m3</i>                      | PCR              |
| re55            | GCACTCCTGATATGCTAACAGCTATG                               | <i>Re_y5-m1</i>                      | PCR              |
| re56            | TGCTATGCAGGGTGTATGATGA                                   | <i>Re_nad5-m9</i>                    | PCR              |
| re57            | TTTTTTTTTTTTTAGTACTAGCAG                                 | <i>Re_y2-m4</i>                      | sequencing       |
| re58            | CCTGCTGATGTGTATCTCTGTG                                   | <i>Re_y5-m3</i>                      | PCR              |
| re59            | ATCATAGTATCTGGTGGCGGA                                    | <i>Re_y5-m2</i>                      | PCR              |
| re60            | CTCTGATGGTATCACCTGTTGAC                                  | <i>Re_nad1-m4</i>                    | PCR              |
| re61            | AAGCAATGCCAGCTATCCGT                                     | <i>Re_nad4-m6/m7</i>                 | PCR              |
| re63            | CATGCTGTAGAGGCACCAAAGG                                   | <i>Re_nad7-m8</i>                    | PCR              |

**Supplementary Table S5.** Sequencing libraries used in this study.

| <b>Library name</b> | <b>Material</b>               | <b>Library prep kit (approx. insert size)</b> | <b>Sequencing technology<sup>a</sup></b> | <b>Nr. of raw read pairs</b> | <b>Read length [nt]</b> | <b>SRA ID</b> |
|---------------------|-------------------------------|-----------------------------------------------|------------------------------------------|------------------------------|-------------------------|---------------|
| Da                  | <i>D. ambulator</i> total DNA | TruSeq DNA (0.5 kb)                           | MiSeq PE                                 | 4,712,258                    | 300                     | SRR5998381    |
| Ds                  | <i>D. sp. 2</i> total DNA     | TruSeq DNA (0.5 kb)                           | MiSeq PE                                 | 4,207,560                    | 300                     | SRR5998377    |
| Re                  | <i>R. euleeides</i> total DNA | TruSeq DNA (0.5 kb)                           | MiSeq PE                                 | 4,990,130                    | 300                     | SRR5998374    |
| DaTs                | <i>D. ambulator</i> total RNA | TruSeq small RNA (0.02-0.5 kb)                | HiSeq PE                                 | 24,051,949                   | 150                     | SRR5998380    |
| DaT                 | <i>D. ambulator</i> total RNA | TruSeq RNA (0.2 kb)                           | MiSeq PE SS                              | 3,038,621                    | 250                     | SRR5998379    |
| DaT-Hi              | <i>D. ambulator</i> total RNA | TruSeq RNA (0.2 kb)                           | HiSeq PE SS                              | 15,789,289                   | 150                     | SRR5998378    |
| DsT                 | <i>D. sp. 2</i> total RNA     | TruSeq RNA (0.2 kb)                           | MiSeq PE SS                              | 3,150,711                    | 250                     | SRR5998376    |
| DsT-Hi              | <i>D. sp. 2</i> total RNA     | TruSeq RNA (0.2 kb)                           | HiSeq PE SS                              | 17,017,840                   | 150                     | SRR5998375    |
| ReT                 | <i>R. euleeides</i> total RNA | TruSeq RNA (0.2 kb)                           | MiSeq PE SS                              | 3,385,789                    | 250                     | SRR5998383    |
| ReT-Hi              | <i>R. euleeides</i> total RNA | TruSeq RNA (0.2 kb)                           | HiSeq PE SS                              | 15,613,531                   | 150                     | SRR5998382    |

<sup>a</sup> PE, paired-end; SS, strand-specific.

**Supplementary Table S6.** Ambiguity of junction positions in *D/R* diplonemids due to the presence of identical nucleotides at the 3' end of the upstream module and the 5' end of the downstream module.

| Gene        | Junction           |                      | Ambiguous in<br>[nr. of species] | Length of identical sequence <sup>a</sup> |           |           |           |
|-------------|--------------------|----------------------|----------------------------------|-------------------------------------------|-----------|-----------|-----------|
|             | Upstream<br>module | Downstream<br>module |                                  | <i>Da</i>                                 | <i>Dp</i> | <i>Ds</i> | <i>Re</i> |
| <i>atp6</i> | m1                 | m2                   | 2                                | 0 nt                                      | 0 nt      | 1 nt      | 2 nt      |
| <i>atp6</i> | m2                 | m3                   | 1                                | 0 nt                                      | 1 nt      | 0 nt      | 0 nt      |
| <i>cob</i>  | m1                 | m2                   | 2                                | 1 nt                                      | 0 nt      | 2 nt      | 0 nt      |
| <i>cob</i>  | m2                 | m3                   | 2                                | 1 nt                                      | 1 nt      | 0 nt      | 0 nt      |
| <i>cob</i>  | m3                 | m4                   | 3                                | 2 nt                                      | 0 nt      | 1 nt      | 2 nt      |
| <i>cob</i>  | m4                 | m5                   | 2                                | 1 nt                                      | 0 nt      | 1 nt      | 0 nt      |
| <i>cob</i>  | m5                 | m6                   | 1                                | 0 nt                                      | 0 nt      | 1 nt      | 0 nt      |
| <i>cox1</i> | m1                 | m2                   | 3                                | 0 nt                                      | 1 nt      | 2 nt      | 1 nt      |
| <i>cox1</i> | m2                 | m3                   | 3                                | 2 nt                                      | 1 nt      | 0 nt      | 1 nt      |
| <i>cox1</i> | m3                 | m4                   | 2                                | 2 nt                                      | 0 nt      | 0 nt      | 1 nt      |
| <i>cox1</i> | m4                 | m5                   | 1                                | 0 nt                                      | 0 nt      | 3 nt      | 0 nt      |
| <i>cox1</i> | m5                 | m6                   | 3                                | 3 nt                                      | 2 nt      | 0 nt      | 2 nt      |
| <i>cox1</i> | m6                 | m7                   | 0                                | 0 nt                                      | 0 nt      | 0 nt      | 0 nt      |
| <i>cox1</i> | m7                 | m8                   | 2                                | 0 nt                                      | 1 nt      | 1 nt      | 0 nt      |
| <i>cox1</i> | m8                 | m9                   | 3                                | 2 nt                                      | 2 nt      | 0 nt      | 3 nt      |
| <i>cox2</i> | m1                 | m2                   | 1                                | 0 nt                                      | 4 nt      | 0 nt      | 0 nt      |
| <i>cox2</i> | m2                 | m3                   | 2                                | 1 nt                                      | 1 nt      | 0 nt      | 0 nt      |
| <i>cox2</i> | m3                 | m4                   | 1                                | 0 nt                                      | 0 nt      | 0 nt      | 1 nt      |
| <i>cox3</i> | m1                 | m2                   | 2                                | 2 nt                                      | 0 nt      | 0 nt      | 3 nt      |
| <i>cox3</i> | m2                 | m3                   | 2                                | 0 nt                                      | 3 nt      | 0 nt      | 4 nt      |
| <i>nad1</i> | m1                 | m2                   | 3                                | 0 nt                                      | 2 nt      | 3 nt      | 3 nt      |
| <i>nad1</i> | m2                 | m3                   | 1                                | 2 nt                                      | 0 nt      | 0 nt      | 0 nt      |
| <i>nad1</i> | m3                 | m4                   | 3                                | 1 nt                                      | 5 nt      | 0 nt      | 1 nt      |
| <i>nad1</i> | m4                 | m5                   | 1                                | 0 nt                                      | 1 nt      | 0 nt      | 0 nt      |
| <i>nad4</i> | m1                 | m2                   | 2                                | 0 nt                                      | 1 nt      | 0 nt      | 6 nt      |
| <i>nad4</i> | m2                 | m3                   | 2                                | 1 nt                                      | 1 nt      | 0 nt      | 0 nt      |
| <i>nad4</i> | m3                 | m4                   | 1                                | 2 nt                                      | 0 nt      | 0 nt      | 0 nt      |
| <i>nad4</i> | m4                 | m5                   | 1                                | 0 nt                                      | 0 nt      | 0 nt      | 2 nt      |
| <i>nad4</i> | m5                 | m6                   | 1                                | 0 nt                                      | 0 nt      | 0 nt      | 1 nt      |
| <i>nad4</i> | m6                 | m7                   | 0                                | 0 nt                                      | 0 nt      | 0 nt      | 0 nt      |
| <i>nad4</i> | m7                 | m8                   | 2                                | 1 nt                                      | 0 nt      | 1 nt      | 0 nt      |
| <i>nad5</i> | m1                 | m2                   | 3                                | 0 nt                                      | 1 nt      | 2 nt      | 1 nt      |
| <i>nad5</i> | m2                 | m3                   | 2                                | 1 nt                                      | 0 nt      | 4 nt      | 0 nt      |
| <i>nad5</i> | m3                 | m4                   | 2                                | 0 nt                                      | 0 nt      | 1 nt      | 1 nt      |
| <i>nad5</i> | m4                 | m5                   | 1                                | 4 nt                                      | 0 nt      | 0 nt      | 0 nt      |
| <i>nad5</i> | m5                 | m6                   | 0                                | 0 nt                                      | 0 nt      | 0 nt      | 0 nt      |
| <i>nad5</i> | m6                 | m7                   | 2                                | 0 nt                                      | 1 nt      | 1 nt      | 0 nt      |
| <i>nad5</i> | m7                 | m8                   | 2                                | 0 nt                                      | 0 nt      | 2 nt      | 1 nt      |
| <i>nad5</i> | m8                 | m9                   | 2                                | 3 nt                                      | 0 nt      | 0 nt      | 3 nt      |
| <i>nad5</i> | m9                 | m10                  | 3                                | 1 nt                                      | 3 nt      | 0 nt      | 2 nt      |
| <i>nad5</i> | m10                | m11                  | 1                                | 0 nt                                      | 0 nt      | 0 nt      | 2 nt      |
| <i>nad7</i> | m1                 | m2                   | 3                                | 0 nt                                      | 1 nt      | 1 nt      | 1 nt      |
| <i>nad7</i> | m2                 | m3                   | 1                                | 0 nt                                      | 0 nt      | 0 nt      | 3 nt      |
| <i>nad7</i> | m3                 | m4                   | 1                                | 0 nt                                      | 0 nt      | 0 nt      | 1 nt      |
| <i>nad7</i> | m4                 | m5                   | 2                                | 0 nt                                      | 0 nt      | 2 nt      | 1 nt      |
| <i>nad7</i> | m5                 | m6                   | 1                                | 0 nt                                      | 1 nt      | 0 nt      | 0 nt      |
| <i>nad7</i> | m6                 | m7                   | 2                                | 1 nt                                      | 0 nt      | 0 nt      | 1 nt      |
| <i>nad7</i> | m7                 | m8                   | 1                                | 1 nt                                      | 0 nt      | 0 nt      | 0 nt      |
| <i>nad7</i> | m8                 | m9                   | 3                                | 2 nt                                      | 3 nt      | 0 nt      | 1 nt      |
| <i>nad8</i> | m1                 | m2                   | 0                                | 0 nt                                      | 0 nt      | 0 nt      | 0 nt      |
| <i>nad8</i> | m2                 | m3                   | 2                                | 2 nt                                      | 1 nt      | 0 nt      | 0 nt      |
| <i>rnl</i>  | m1                 | m2                   | 4                                | 1 nt                                      | 2 nt      | 2 nt *    | 1 nt *    |

| Gene      | Junction           |                      | Ambiguous in<br>[nr. of species] | Length of identical sequence <sup>a</sup> |           |           |           |
|-----------|--------------------|----------------------|----------------------------------|-------------------------------------------|-----------|-----------|-----------|
|           | Upstream<br>module | Downstream<br>module |                                  | <i>Da</i>                                 | <i>Dp</i> | <i>Ds</i> | <i>Re</i> |
| <i>y1</i> | m1                 | m2                   | 0                                | 0 nt                                      | 0 nt      | 0 nt      | 0 nt      |
| <i>y2</i> | m1                 | m2                   | 3                                | 1 nt                                      | 0 nt      | 2 nt      | 3 nt      |
| <i>y2</i> | m2                 | m3                   | 2                                | 1 nt                                      | 1 nt      | 0 nt      | 0 nt      |
| <i>y2</i> | m3                 | m4                   | 4                                | 1 nt                                      | 1 nt *    | 1 nt      | 1 nt *    |
| <i>y3</i> | m1                 | m2                   | 1                                | 0 nt                                      | 0 nt      | n.a.      | 2 nt      |
| <i>y3</i> | m2                 | m3                   | 1                                | 0 nt                                      | 1 nt      | 0 nt      | 0 nt      |
| <i>y3</i> | m3                 | m4                   | 2                                | 1 nt                                      | 0 nt      | 0 nt      | 1 nt *    |
| <i>y3</i> | m4                 | m5                   | 4                                | 3 nt *                                    | 1 nt *    | 1 nt      | 1 nt *    |
| <i>y5</i> | m1                 | m2                   | 3                                | 1 nt *                                    | 0 nt      | 2 nt *    | 1 nt *    |
| <i>y5</i> | m2                 | m3                   | 1                                | 1 nt                                      | 0 nt      | 0 nt      | 0 nt      |
| <i>y6</i> | m1                 | m2                   | 1                                | 0 nt                                      | 0 nt      | 2 nt      | 0 nt      |

  

| Summary — Number of junctions       | All four species | <i>Da</i> | <i>Dp</i> | <i>Ds</i> | <i>Re</i> |
|-------------------------------------|------------------|-----------|-----------|-----------|-----------|
| Unambiguous                         | 136              | 32        | 36        | 39        | 29        |
| Initially ambiguous due to overlaps | 115              | 31        | 27        | 23        | 34        |
| Remain ambiguous                    | 11               | 2         | 2         | 2         | 5         |
| All                                 | 251              | 63        | 63        | 62        | 63        |

<sup>a</sup> Asterisks indicate junctions that remained unresolved after RNA-Seq-based curation. n.a., not applicable (junction absent)

**Supplementary Table S7.** GenBank accession numbers of edited mitochondrial RNAs of *D/R*-clade diplomemids.

| Organism             | RNA         | GenBank Acc. Nr.   | Reference                                 |
|----------------------|-------------|--------------------|-------------------------------------------|
| <i>D. ambulator</i>  | <i>atp6</i> | MF436931           | This report                               |
|                      | <i>cob</i>  | MF436932           | This report                               |
|                      | <i>cox1</i> | MF436933           | This report                               |
|                      | <i>cox2</i> | MF436934           | This report                               |
|                      | <i>cox3</i> | MF436935           | This report                               |
|                      | <i>nad1</i> | MF436936           | This report                               |
|                      | <i>nad4</i> | MF436937, KU341385 | This report, Moreira <i>et al.</i> , 2016 |
|                      | <i>nad5</i> | MF436938           | This report                               |
|                      | <i>nad7</i> | MF436939           | This report                               |
|                      | <i>nad8</i> | MF436940           | This report                               |
|                      | <i>rnl</i>  | MF436941           | This report                               |
|                      | <i>rns</i>  | MF436942           | This report                               |
|                      | <i>y1</i>   | MF436943           | This report                               |
|                      | <i>y2</i>   | MF436944           | This report                               |
|                      | <i>y3</i>   | MF436945           | This report                               |
|                      | <i>y5</i>   | MF436946           | This report                               |
| <i>y6</i>            | MF436947    | This report        |                                           |
| <i>D. sp. 2</i>      | <i>atp6</i> | MF436948           | This report                               |
|                      | <i>cob</i>  | MF436949           | This report                               |
|                      | <i>cox1</i> | MF436950           | This report                               |
|                      | <i>cox2</i> | MF436951           | This report                               |
|                      | <i>cox3</i> | MF436952           | This report                               |
|                      | <i>nad1</i> | MF436953           | This report                               |
|                      | <i>nad4</i> | MF436954, KU341387 | This report, Moreira <i>et al.</i> , 2016 |
|                      | <i>nad5</i> | MF436955           | This report                               |
|                      | <i>nad7</i> | MF436956           | This report                               |
|                      | <i>nad8</i> | MF436957           | This report                               |
|                      | <i>rnl</i>  | MF436964           | This report                               |
|                      | <i>rns</i>  | MF436963           | This report                               |
|                      | <i>y1</i>   | MF436958           | This report                               |
|                      | <i>y2</i>   | MF436959           | This report                               |
|                      | <i>y3</i>   | MF436960           | This report                               |
|                      | <i>y5</i>   | MF436961           | This report                               |
| <i>y6</i>            | MF436962    | This report        |                                           |
| <i>R. euleeides</i>  | <i>atp6</i> | MF436965           | This report                               |
|                      | <i>cob</i>  | MF436978           | This report                               |
|                      | <i>cox1</i> | MF436979           | This report                               |
|                      | <i>cox2</i> | MF436966           | This report                               |
|                      | <i>cox3</i> | MF436967           | This report                               |
|                      | <i>nad1</i> | MF436968           | This report                               |
|                      | <i>nad4</i> | MF436969, KU341389 | This report, Moreira <i>et al.</i> , 2016 |
|                      | <i>nad5</i> | MF436970           | This report                               |
|                      | <i>nad7</i> | MF436971           | This report                               |
|                      | <i>nad8</i> | MF436972           | This report                               |
|                      | <i>rnl</i>  | MF436981           | This report                               |
|                      | <i>rns</i>  | MF436980           | This report                               |
|                      | <i>y1</i>   | MF436973           | This report                               |
|                      | <i>y2</i>   | MF436974           | This report                               |
|                      | <i>y3</i>   | MF436975           | This report                               |
|                      | <i>y5</i>   | MF436976           | This report                               |
| <i>y6</i>            | MF436977    | This report        |                                           |
| <i>D. papillatum</i> | <i>atp6</i> | KU341361           | Moreira <i>et al.</i> , 2016              |
|                      | <i>cob</i>  | KU341362           | Moreira <i>et al.</i> , 2016              |

| <b>Organism</b> | <b>RNA</b>  | <b>GenBank Acc. Nr.</b> | <b>Reference</b>             |
|-----------------|-------------|-------------------------|------------------------------|
|                 | <i>cox1</i> | KU341363                | Moreira <i>et al.</i> , 2016 |
|                 | <i>cox2</i> | KU341364                | Moreira <i>et al.</i> , 2016 |
|                 | <i>cox3</i> | KU341365                | Moreira <i>et al.</i> , 2016 |
|                 | <i>nad1</i> | KU341366                | Moreira <i>et al.</i> , 2016 |
|                 | <i>nad4</i> | KU341367                | Moreira <i>et al.</i> , 2016 |
|                 | <i>nad5</i> | KU341368                | Moreira <i>et al.</i> , 2016 |
|                 | <i>nad7</i> | KU341369                | Moreira <i>et al.</i> , 2016 |
|                 | <i>nad8</i> | KU341370                | Moreira <i>et al.</i> , 2016 |
|                 | <i>rnl</i>  | KU341371                | Moreira <i>et al.</i> , 2016 |
|                 | <i>rns</i>  | KU341372                | Moreira <i>et al.</i> , 2016 |
|                 | <i>y1</i>   | KU341373                | Moreira <i>et al.</i> , 2016 |
|                 | <i>y2</i>   | KU341374                | Moreira <i>et al.</i> , 2016 |
|                 | <i>y3</i>   | KU341375                | Moreira <i>et al.</i> , 2016 |
|                 | <i>y4</i>   | KU341376                | Moreira <i>et al.</i> , 2016 |
|                 | <i>y5</i>   | KU341377                | Moreira <i>et al.</i> , 2016 |
|                 | <i>y6</i>   | KU341378                | Moreira <i>et al.</i> , 2016 |







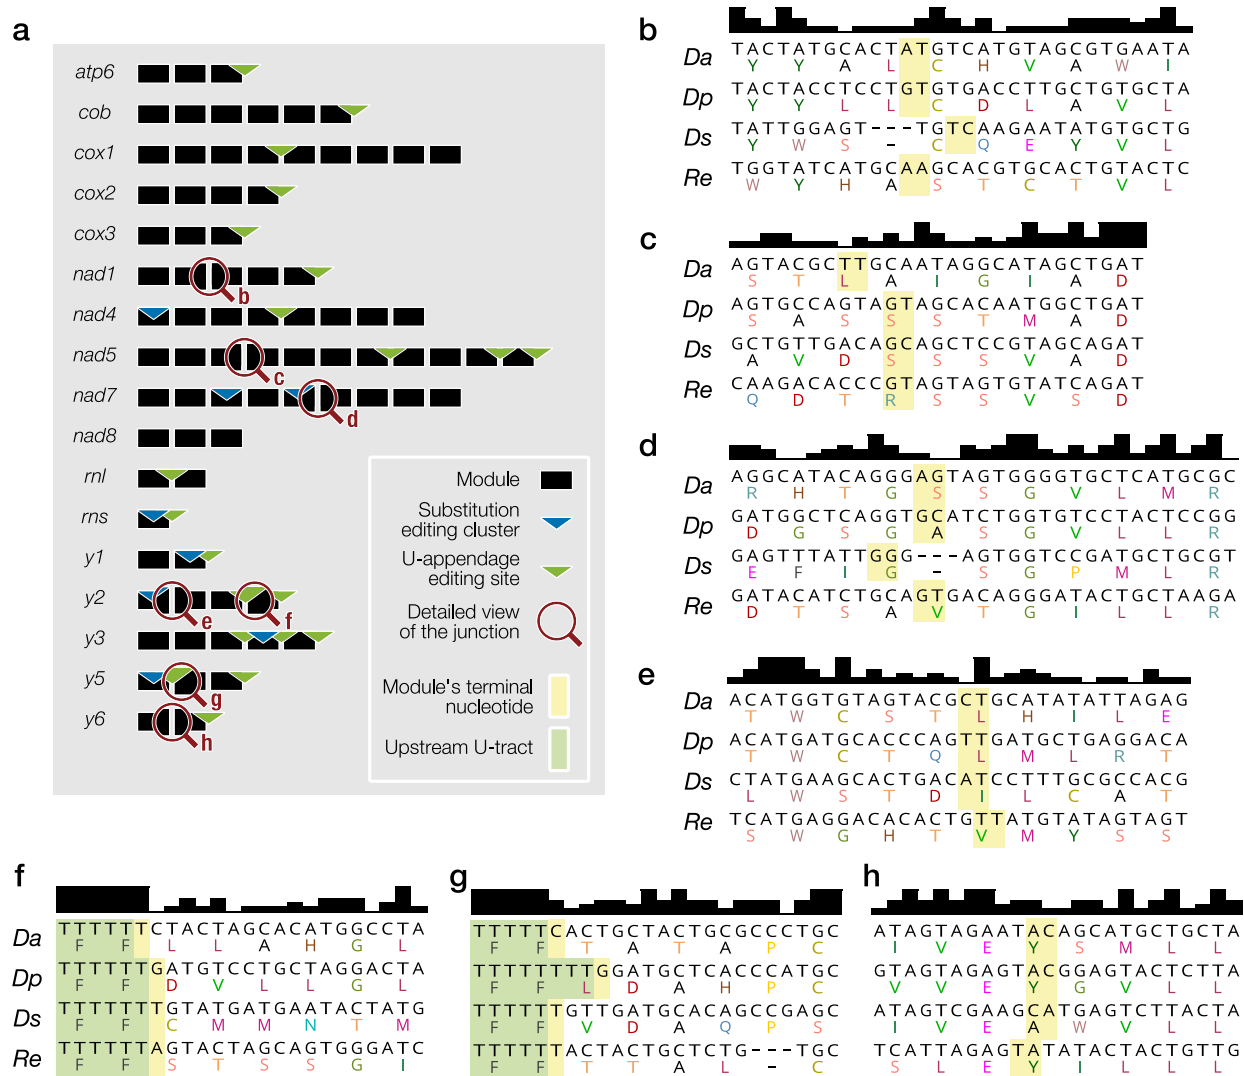

**Supplementary Fig. S2.** Variations in mitochondrial gene breakpoints across *D/R*-clade diplonemids. **(a)** Overview of gene fragmentation and positions of RNA editing sites. Inset, the colour-shading key and the feature key: black rectangles, modules; green triangles, U-appendage RNA editing sites at 3' ends of modules; blue triangles, substitution clusters; the magnification glass symbol and letter refer to the sequence-level close-up in **b-h**. **(b-h)** Sections of multiple alignments of cDNA sequences with focus on a particular junction. The upper track indicates by shading and bar height the extent of DNA sequence similarity (see Methods for details). The inferred protein sequence is shown below in the one-letter code. *Da*, *D. ambulator*; *Dp*, *D. papillatum*; *Ds*, *D. sp. 2*; *Re*, *R. euleleides*. **(b)** Detail of *nad1*-m2 and -m3. **(c)** *nad5*-m3 and -m4. **(d)** *nad7*-m5 and -m6. **(e)** *y2*-m1 and -m2. **(f)** U-tract appended to *y2*-m3 followed by -m4. **(g)** U-tract appended to *y5*-m1 followed by -m2. **(h)** *y6*-m1 and -m2. Note that the module junctions *Re\_y2*-m1/m2 **(e)**, *Da\_y2*-m3/m4 **(f)**, and *Re\_y6*-m1/m2 **(h)** are shifted by 1 nt. These are the only instances, where the size differences between homologous modules are not a multiple of three.

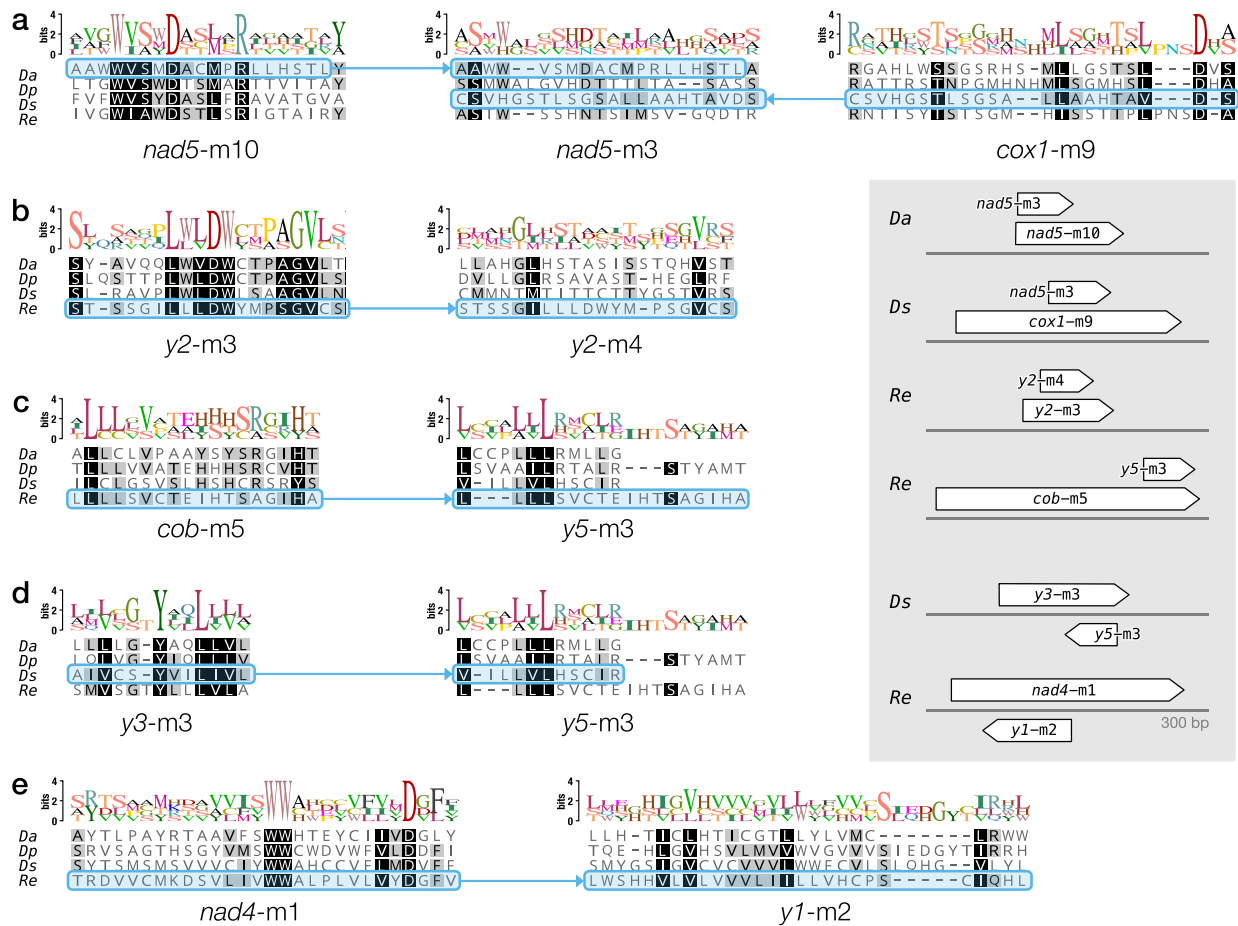

**Supplementary Fig. S3.** Multiple protein-sequence alignments of nested modules. The embedded modules code for more divergent protein regions than the enclosing modules. Blue-boxed sequences derive from the same nucleotide sequence. The arrow points towards the embedded module. Note that for the enclosing module, only the region that overlaps the embedded module is shown. **(a)** Part of *nad5-m10* and *cox1-m9* is reused as *nad5-m3* in *D. ambulator* and *D. sp. 2*, respectively. **(b, c)** In *R. euleeides*, part of *y2-m3* is reused as *y2-m4* and part of *cob-m5* as *y3-m5*. **(d)** In *D. sp. 2*, *y5-m3* is encoded by the reverse complementary strand inside *y3-m3*. **(e)** In *R. euleeides*, *y1-m2* is located on the reverse complementary strand inside *nad4-m1*. Inset, genomic arrangement of the nested modules (to scale with the grey bar representing 300 bp). *Da*, *Diplonema ambulator*; *Dp*, *Diplonema papillatum*; *Ds*, *Diplonema sp. 2*; *Re*, *Rhynchopus euleeides*.



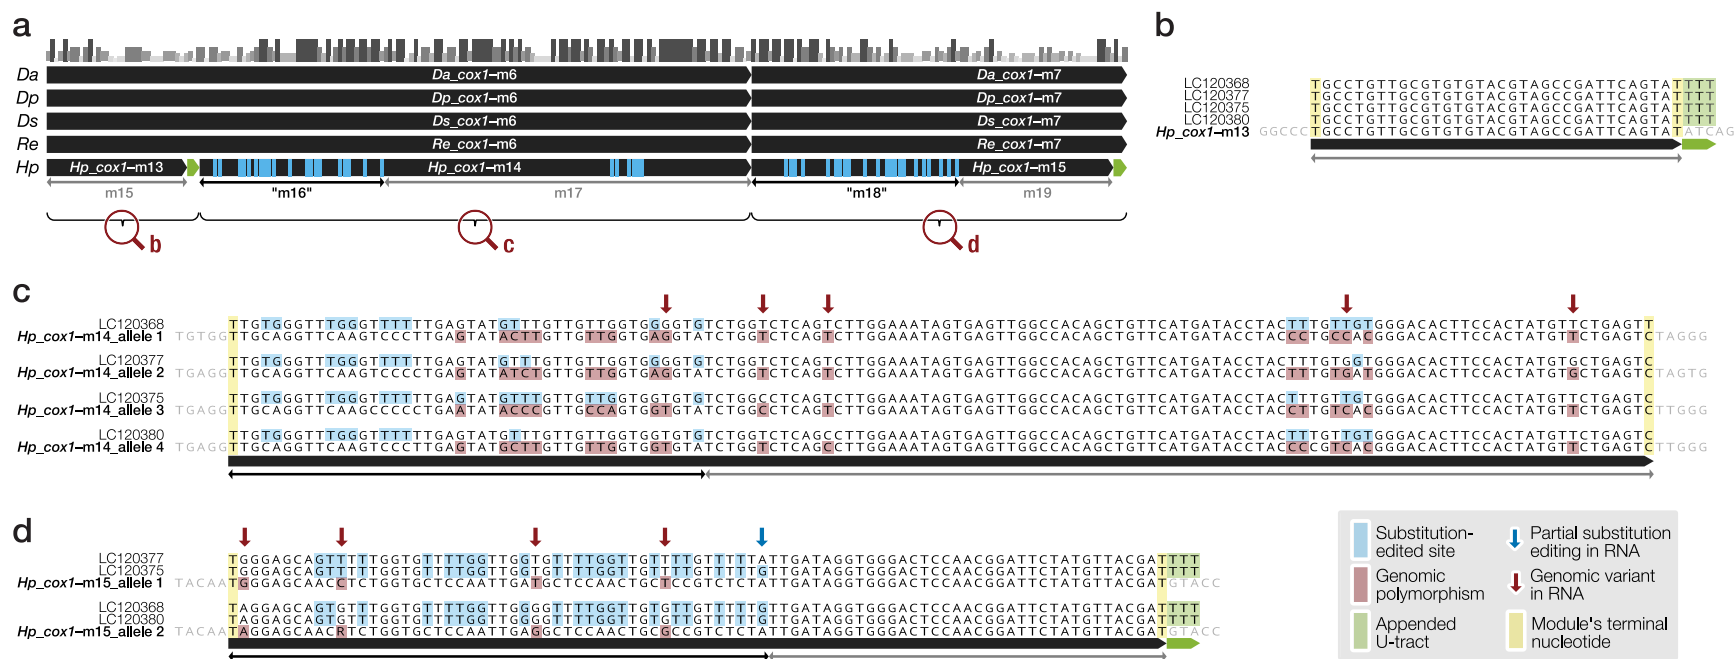

**Supplementary Fig. S5.** Numerous massive substitution editing clusters in *cox1* of *Hemistasia phaeocysticola* hinder identification of modules in the mtDNA sequence. **(a)** Overview of a segment of the multiple alignment of *cox1* transcripts from *Diplonema ambulator* (*Da*), *D. papillatum* (*Dp*), *D. sp. 2* (*Ds*), *Rhynchopus euleeides* (*Re*), and *Hemistasia phaeocysticola* (*Hp*). The upper track indicates the similarity among the five sequences by bar shading and height. The region corresponds to modules 6 and 7 in *D/R* diplonemids and to modules 13, 14, and 15 (numbering according to our re-annotation) of *H. phaeocysticola*. In the original report <sup>2</sup>, this region was referred to as m15 to m19, with “m16” and “m18” corresponding to modules “missing” in the mtDNA sequence (see the highlighting by black and grey horizontal bars below the alignment). The blue vertical bars indicate the substitution RNA editing sites inferred from the comparison of the genomic and transcript data as detailed below. The magnification glass symbols and letters refer to sequence-level close-ups of mtDNA and cDNA comparisons from *H. phaeocysticola* in **b-d**. **(b)** Detailed view of *Hp\_cox1-m13* from mtDNA and four representative cDNAs (GenBank Acc. LC120368, LC120377, LC120375, LC120380). Flanking non-coding sequence is indicated in light grey. **(c)** Detailed view of the four alleles of *Hp\_cox1-m14* from mtDNA and four representative cDNAs (same as above), each corresponding to one of the genomic variants. Diagnostic positions are indicated by red arrows above the alignment. Note that substitution RNA editing also makes the various mitochondrial genomic alleles of modules more similar to each other. **(d)** Detailed view of the two alleles of *Hp\_cox1-m15* from mtDNA and four representative cDNAs (same as above). Inset, the colour-shading key for feature highlighting.

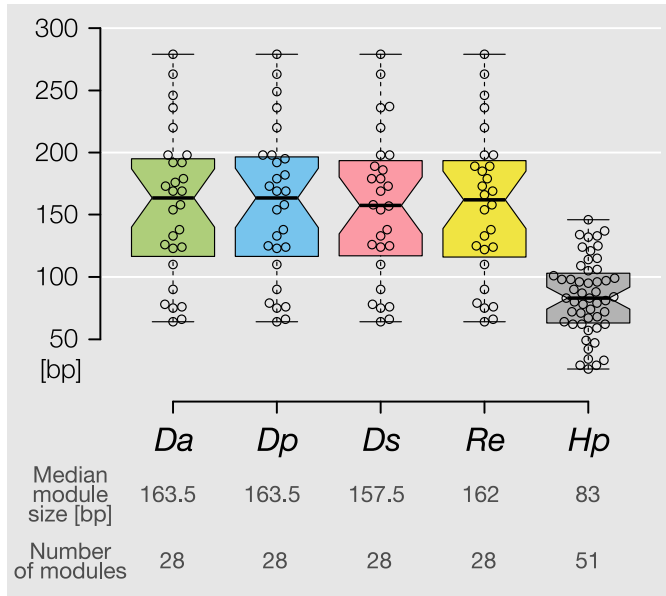

**Supplementary Fig. S6.** The average module size in *Hemistasia* is half their size of those in *D/R* diplomonads. Size distributions were compared for gene modules of *cob*, *cox1*, *cox2*, and *nad7* from *Diplonema ambulator* (*Da*), *D. papillatum* (*Dp*), *D. sp. 2* (*Ds*), *Rhynchopus euleeides* (*Re*), and *Hemistasia phaeocysticola* (*Hp*). In the latter species, values correspond to our data re-analysis (see main text and [Supplementary Fig. S5, S7](#)).

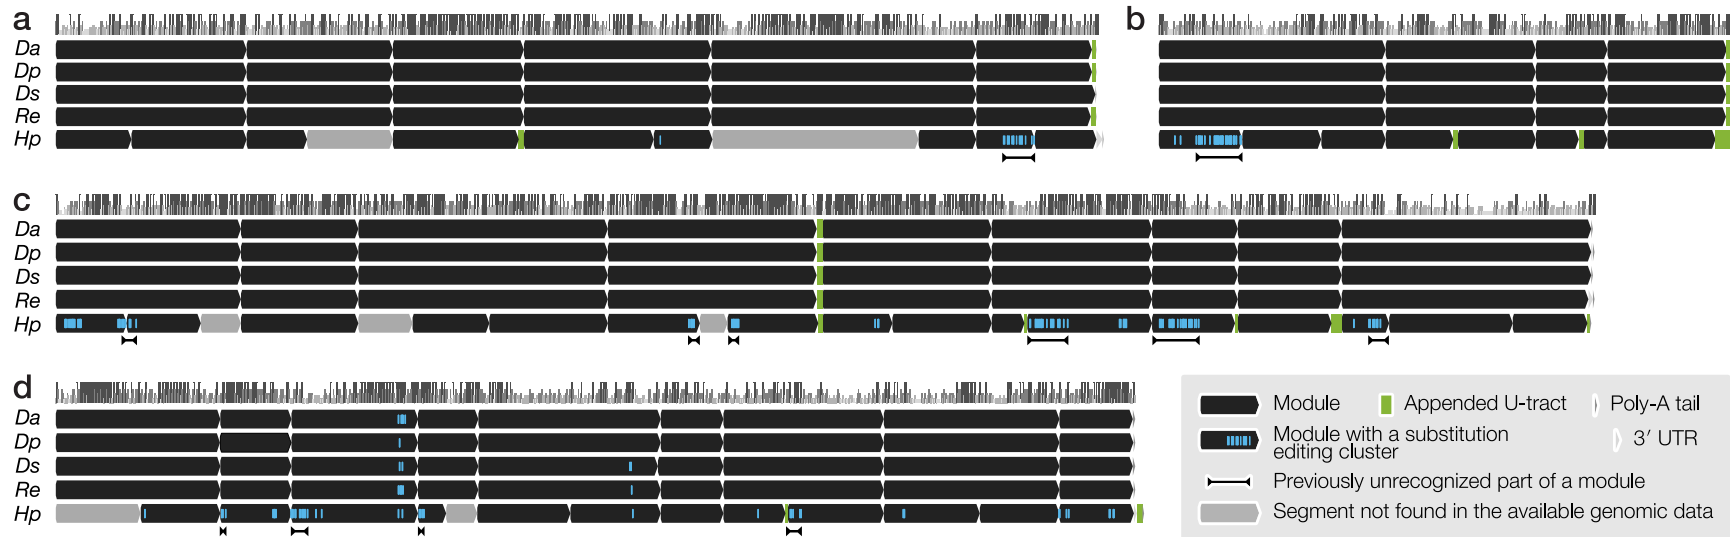

**Supplementary Fig. S7.** Additional substitution RNA editing clusters and U-appendage sites occur near additional modules junctions in *Hemistasia phaeocysticola*. Comparison of gene fragmentation and editing sites in the mature transcripts of the genes *cob* (a), *cox2* (b), *cox1* (c), and *nad7* (d) from *Diplonema ambulator* (*Da*), *D. papillatum* (*Dp*), *D. sp. 2* (*Ds*), *Rhynchopus euleeides* (*Re*), and *H. phaeocysticola* (*Hp*). The track above the multiple sequence alignment indicates the similarity among the five sequences by bar shading and height. Inset, the feature key.

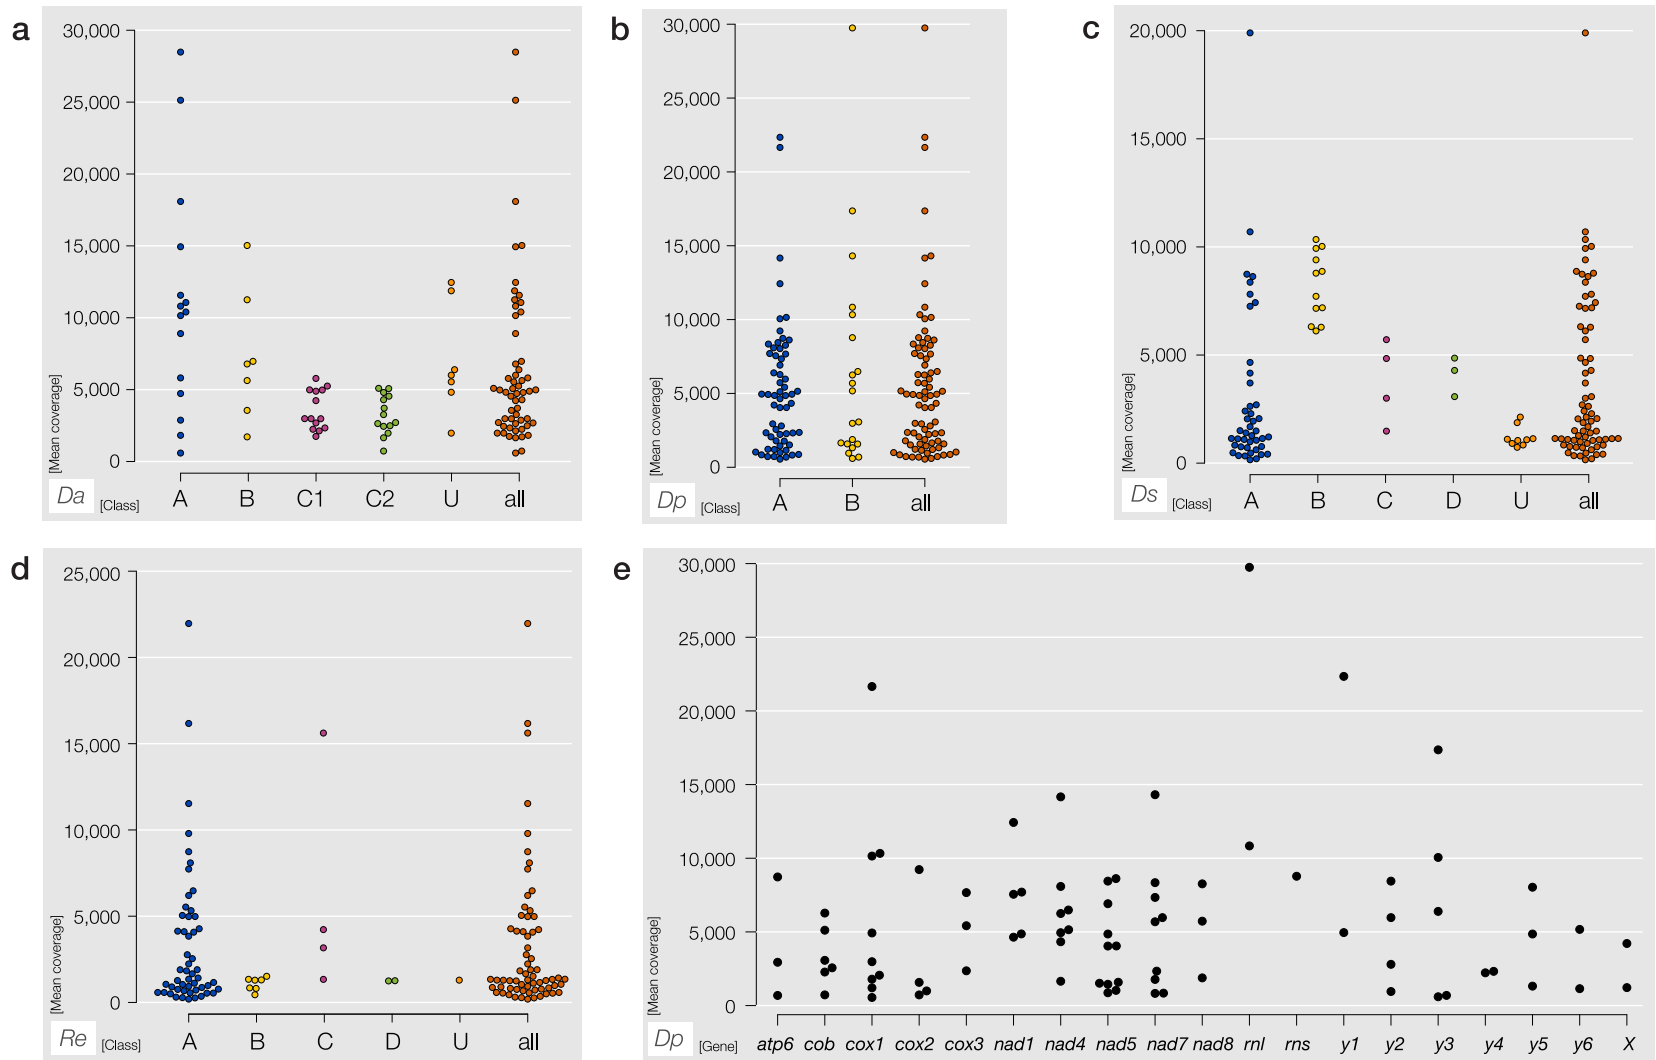

**Supplementary Fig. S8.** Fluctuation of mitochondrial chromosome abundance in *D/R*-group diplomonads. **(a-d)** Distribution of read mean coverage of individual cassettes or module arrays binned by class (A-D, U, and all combined). **(a)** Distribution for *D. ambulator* (*Da*). Note that C1 and C2 classes, which constitute bi-cassette chromosomes, are plotted separately to show similar coverage, further indicating their association. **(b)** Distribution for *D. papillatum* (*Dp*); **(c)** for *D. sp. 2* (*Ds*); and **(d)** for *R. euleeides* (*Re*). **(e)** Distribution of read mean coverage of cassettes depending on the gene, whose modules they code for in *D. papillatum* (*Dp*). (For details, see also [Supplementary Table S2](#) and Methods; *D. papillatum* data are from <sup>1</sup>.)

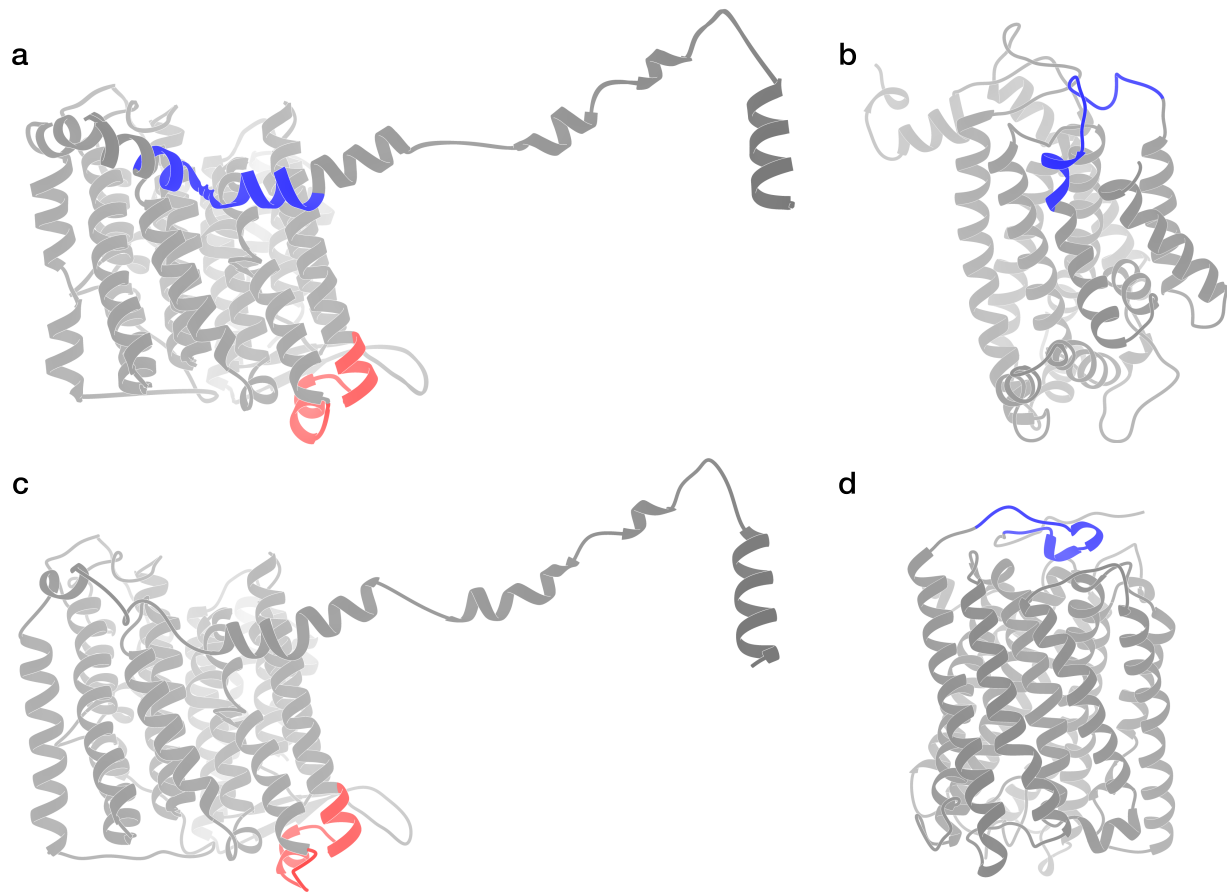

**Supplementary Fig. S9.** Dual-use segments of diplo-nemid mitochondrial proteins are predicted to specify peripheral loops and short  $\alpha$ -helices that connect trans-membrane helices. Segments originating from the enclosing and embedded module are shown in blue and orange, respectively. The C-terminus of the three-dimensional protein models is on the right side. **(a)** Nad5 protein from *D. ambulator* (*nad5*-m3 is embedded in *nad5*-m10). **(b)** Cob protein from *R. euleeides* (*y5*-m3 is embedded in *cob*-m5). Note that only the segment of the enclosing module is highlighted, since the *y5* gene is unassigned. **(c, d)** Nad5 and Cox1 proteins from *D. sp. 2*, respectively (*nad5*-m3 is embedded in *cox1*-m9). (For details, see also [Supplementary Fig. S3](#) and Methods.)

#### SUPPLEMENTARY REFERENCES

1. Moreira, S., Valach, M., Aoulad-Aissa, M., Otto, C. & Burger, G. Novel modes of RNA editing in mitochondria. *Nucleic Acids Res.* **44**, 4907–4919 (2016).
2. Yabuki, A., Tanifuji, G., Kusaka, C., Takishita, K. & Fujikura, K. Hyper-eccentric structural genes in the mitochondrial genome of the algal parasite *Hemistasia phaeocysticola*. *Genome Biol. Evol.* **8**, 2870–2878 (2016).
